# Supplementary material for: Synergy between roads and disturbance favour Bromus tectorum L. invasion
Source: PeerJ. 2018 Aug 31;6:e5529. doi: 10.7717/peerj.5529 (PMC6120438; doi:10.7717/peerj.5529)
Supplement: Supplemental Information 1 — Within metadata tabs, every variable is explained. [file peerj-06-5529-s001.xlsx]

## Sheet: Field Data
Route	Habitat	Date	WP_id	Latitude	Longitude	Altitude	Plot	Disturbance_level	Distance	BT_field_level	BT_field_abundance
R40-231	Shrub_steppe	2017-03-10	1	-41.0395	-71.2155	907.363	Field	Low	0	0	0
R40-231	Shrub_steppe	2017-03-10	1	-41.0395	-71.2155	907.363	Field	Low	5	1	15
R40-231	Shrub_steppe	2017-03-10	1	-41.0395	-71.2155	907.363	Field	Low	10	0	0
R40-231	Shrub_steppe	2017-03-10	1	-41.0395	-71.2155	907.363	Field	Low	15	0	0
R40-231	Shrub_steppe	2017-03-10	1	-41.0395	-71.2155	907.363	Field	Low	20	0	0
R40-231	Shrub_steppe	2017-03-10	1	-41.0395	-71.2155	907.363	Field	Low	25	0	0
R40-231	Shrub_steppe	2017-03-10	1	-41.0395	-71.2155	907.363	Field	Low	30	0	0
R40-231	Shrub_steppe	2017-03-10	1	-41.0395	-71.2155	907.363	Field	Low	35	0	0
R40-231	Shrub_steppe	2017-03-10	1	-41.0395	-71.2155	907.363	Field	Low	40	0	0
R40-231	Shrub_steppe	2017-03-10	1	-41.0395	-71.2155	907.363	Field	Low	45	0	0
R40-231	Shrub_steppe	2017-03-10	1	-41.0354	-71.27	907.844	Field	Low	50	0	0
R40-231	Shrub_steppe	2017-03-10	1	-41.0354	-71.27	907.844	Field	Low	100	0	0
R40-231	Shrubland	2017-03-10	2	-41.0354	-71.27	907.844	Field	Low	0	0	0
R40-231	Shrubland	2017-03-10	2	-41.0354	-71.27	907.844	Field	Low	5	0	0
R40-231	Shrubland	2017-03-10	2	-41.0354	-71.27	907.844	Field	Low	10	0	0
R40-231	Shrubland	2017-03-10	2	-41.0354	-71.27	907.844	Field	Low	15	0	0
R40-231	Shrubland	2017-03-10	2	-41.0354	-71.27	907.844	Field	Low	20	0	0
R40-231	Shrubland	2017-03-10	2	-41.0354	-71.27	907.844	Field	Low	25	0	0
R40-231	Shrubland	2017-03-10	2	-41.0354	-71.27	907.844	Field	Low	30	0	0
R40-231	Shrubland	2017-03-10	2	-41.0354	-71.27	907.844	Field	Low	35	0	0
R40-231	Shrubland	2017-03-10	2	-41.0354	-71.27	907.844	Field	Low	40	0	0
R40-231	Shrubland	2017-03-10	2	-41.0354	-71.27	907.844	Field	Low	45	0	0
R40-231	Shrubland	2017-03-10	2	-41.0354	-71.27	907.844	Field	Low	50	0	0
R40-231	Shrubland	2017-03-10	2	-41.0354	-71.27	907.844	Field	Low	100	0	0
R237	Grassy_steppe	2017-03-10	4	-40.9978	-71.1178	776.144	Field	Intermediate	0	1	15
R237	Grassy_steppe	2017-03-10	4	-40.9978	-71.1178	776.144	Field	Intermediate	5	0	0
R237	Grassy_steppe	2017-03-10	4	-40.9978	-71.1178	776.144	Field	Intermediate	10	0	0
R237	Grassy_steppe	2017-03-10	4	-40.9978	-71.1178	776.144	Field	Intermediate	15	0	0
R237	Grassy_steppe	2017-03-10	4	-40.9978	-71.1178	776.144	Field	Intermediate	20	0	0
R237	Grassy_steppe	2017-03-10	4	-40.9978	-71.1178	776.144	Field	Intermediate	25	0	0
R237	Grassy_steppe	2017-03-10	4	-40.9978	-71.1178	776.144	Field	Intermediate	30	0	0
R237	Grassy_steppe	2017-03-10	4	-40.9978	-71.1178	776.144	Field	Intermediate	35	0	0
R237	Grassy_steppe	2017-03-10	4	-40.9978	-71.1178	776.144	Field	Intermediate	40	0	0
R237	Grassy_steppe	2017-03-10	4	-40.9978	-71.1178	776.144	Field	Intermediate	45	0	0
R237	Grassy_steppe	2017-03-10	4	-40.9978	-71.1178	776.144	Field	Intermediate	50	0	0
R237	Grassy_steppe	2017-03-10	4	-40.9978	-71.1178	776.144	Field	Intermediate	100	0	0
R237	Shrubland	2017-03-10	5	-40.9711	-71.0719	760.042	Field	Low	0	0	0
R237	Shrubland	2017-03-10	5	-40.9711	-71.0719	760.042	Field	Low	5	0	0
R237	Shrubland	2017-03-10	5	-40.9711	-71.0719	760.042	Field	Low	10	0	0
R237	Shrubland	2017-03-10	5	-40.9711	-71.0719	760.042	Field	Low	15	0	0
R237	Shrubland	2017-03-10	5	-40.9711	-71.0719	760.042	Field	Low	20	0	0
R237	Shrubland	2017-03-10	5	-40.9711	-71.0719	760.042	Field	Low	25	0	0
R237	Shrubland	2017-03-10	5	-40.9711	-71.0719	760.042	Field	Low	30	0	0
R237	Shrubland	2017-03-10	5	-40.9711	-71.0719	760.042	Field	Low	35	0	0
R237	Shrubland	2017-03-10	5	-40.9711	-71.0719	760.042	Field	Low	40	0	0
R237	Shrubland	2017-03-10	5	-40.9711	-71.0719	760.042	Field	Low	45	0	0
R237	Shrubland	2017-03-10	5	-40.9711	-71.0719	760.042	Field	Low	50	0	0
R237	Shrubland	2017-03-10	5	-40.9711	-71.0719	760.042	Field	Low	100	0	0
R237	Shrubland	2017-03-10	6	-40.9351	-71.0395	747.064	Field	Intermediate	0	1	15
R237	Shrubland	2017-03-10	6	-40.9351	-71.0395	747.064	Field	Intermediate	5	2	25
R237	Shrubland	2017-03-10	6	-40.9351	-71.0395	747.064	Field	Intermediate	10	2	25
R237	Shrubland	2017-03-10	6	-40.9351	-71.0395	747.064	Field	Intermediate	15	3	50
R237	Shrubland	2017-03-10	6	-40.9351	-71.0395	747.064	Field	Intermediate	20	3	50
R237	Shrubland	2017-03-10	6	-40.9351	-71.0395	747.064	Field	Intermediate	25	2	25
R237	Shrubland	2017-03-10	6	-40.9351	-71.0395	747.064	Field	Intermediate	30	2	25
R237	Shrubland	2017-03-10	6	-40.9351	-71.0395	747.064	Field	Intermediate	35	4	75
R237	Shrubland	2017-03-10	6	-40.9351	-71.0395	747.064	Field	Intermediate	40	1	15
R237	Shrubland	2017-03-10	6	-40.9351	-71.0395	747.064	Field	Intermediate	45	2	25
R237	Shrubland	2017-03-10	6	-40.9351	-71.0395	747.064	Field	Intermediate	50	5	100
R237	Shrubland	2017-03-10	6	-40.9351	-71.0395	747.064	Field	Intermediate	100	5	100
R237	Grassy_steppe	2017-03-10	7	-40.8879	-71.0421	738.413	Field	Low	0	1	15
R237	Grassy_steppe	2017-03-10	7	-40.8879	-71.0421	738.413	Field	Low	5	1	15
R237	Grassy_steppe	2017-03-10	7	-40.8879	-71.0421	738.413	Field	Low	10	0	0
R237	Grassy_steppe	2017-03-10	7	-40.8879	-71.0421	738.413	Field	Low	15	0	0
R237	Grassy_steppe	2017-03-10	7	-40.8879	-71.0421	738.413	Field	Low	20	2	25
R237	Grassy_steppe	2017-03-10	7	-40.8879	-71.0421	738.413	Field	Low	25	0	0
R237	Grassy_steppe	2017-03-10	7	-40.8879	-71.0421	738.413	Field	Low	30	4	75
R237	Grassy_steppe	2017-03-10	7	-40.8879	-71.0421	738.413	Field	Low	35	1	15
R237	Grassy_steppe	2017-03-10	7	-40.8879	-71.0421	738.413	Field	Low	40	2	25
R237	Grassy_steppe	2017-03-10	7	-40.8879	-71.0421	738.413	Field	Low	45	1	15
R237	Grassy_steppe	2017-03-10	7	-40.8879	-71.0421	738.413	Field	Low	50	2	25
R237	Grassy_steppe	2017-03-10	7	-40.8879	-71.0421	738.413	Field	Low	100	2	25
R237	Shrub_steppe	2017-03-10	8	-40.8649	-71.0599	739.374	Field	Intermediate	0	2	25
R237	Shrub_steppe	2017-03-10	8	-40.8649	-71.0599	739.374	Field	Intermediate	5	2	25
R237	Shrub_steppe	2017-03-10	8	-40.8649	-71.0599	739.374	Field	Intermediate	10	1	15
R237	Shrub_steppe	2017-03-10	8	-40.8649	-71.0599	739.374	Field	Intermediate	15	1	15
R237	Shrub_steppe	2017-03-10	8	-40.8649	-71.0599	739.374	Field	Intermediate	20	2	25
R237	Shrub_steppe	2017-03-10	8	-40.8649	-71.0599	739.374	Field	Intermediate	25	2	25
R237	Shrub_steppe	2017-03-10	8	-40.8649	-71.0599	739.374	Field	Intermediate	30	1	15
R237	Shrub_steppe	2017-03-10	8	-40.8649	-71.0599	739.374	Field	Intermediate	35	2	25
R237	Shrub_steppe	2017-03-10	8	-40.8649	-71.0599	739.374	Field	Intermediate	40	2	25
R237	Shrub_steppe	2017-03-10	8	-40.8649	-71.0599	739.374	Field	Intermediate	45	2	25
R237	Shrub_steppe	2017-03-10	8	-40.8649	-71.0599	739.374	Field	Intermediate	50	1	15
R237	Shrub_steppe	2017-03-10	8	-40.8649	-71.0599	739.374	Field	Intermediate	100	1	15
R237	Shrubland	2017-03-10	9	-40.843	-71.1009	727.598	Field	High	0	1	15
R237	Shrubland	2017-03-10	9	-40.843	-71.1009	727.598	Field	High	5	2	25
R237	Shrubland	2017-03-10	9	-40.843	-71.1009	727.598	Field	High	10	2	25
R237	Shrubland	2017-03-10	9	-40.843	-71.1009	727.598	Field	High	15	2	25
R237	Shrubland	2017-03-10	9	-40.843	-71.1009	727.598	Field	High	20	4	75
R237	Shrubland	2017-03-10	9	-40.843	-71.1009	727.598	Field	High	25	4	75
R237	Shrubland	2017-03-10	9	-40.843	-71.1009	727.598	Field	High	30	3	50
R237	Shrubland	2017-03-10	9	-40.843	-71.1009	727.598	Field	High	35	4	75
R237	Shrubland	2017-03-10	9	-40.843	-71.1009	727.598	Field	High	40	3	50
R237	Shrubland	2017-03-10	9	-40.843	-71.1009	727.598	Field	High	45	5	100
R237	Shrubland	2017-03-10	9	-40.843	-71.1009	727.598	Field	High	50	3	50
R237	Shrubland	2017-03-10	9	-40.843	-71.1009	727.598	Field	High	100	3	50
R237	Shrubland	2017-03-10	10	-40.8068	-71.1174	711.256	Field	High	0	3	50
R237	Shrubland	2017-03-10	10	-40.8068	-71.1174	711.256	Field	High	5	3	50
R237	Shrubland	2017-03-10	10	-40.8068	-71.1174	711.256	Field	High	10	3	50
R237	Shrubland	2017-03-10	10	-40.8068	-71.1174	711.256	Field	High	15	2	25
R237	Shrubland	2017-03-10	10	-40.8068	-71.1174	711.256	Field	High	20	2	25
R237	Shrubland	2017-03-10	10	-40.8068	-71.1174	711.256	Field	High	25	2	25
R237	Shrubland	2017-03-10	10	-40.8068	-71.1174	711.256	Field	High	30	2	25
R237	Shrubland	2017-03-10	10	-40.8068	-71.1174	711.256	Field	High	35	2	25
R237	Shrubland	2017-03-10	10	-40.8068	-71.1174	711.256	Field	High	40	1	15
R237	Shrubland	2017-03-10	10	-40.8068	-71.1174	711.256	Field	High	45	1	15
R237	Shrubland	2017-03-10	10	-40.8068	-71.1174	711.256	Field	High	50	0	0
R237	Shrubland	2017-03-10	10	-40.8068	-71.1174	711.256	Field	High	100	0	0
R237	Shrub_steppe	2017-03-10	11	-40.7671	-71.1223	713.659	Field	Intermediate	0	0	0
R237	Shrub_steppe	2017-03-10	11	-40.7671	-71.1223	713.659	Field	Intermediate	5	1	15
R237	Shrub_steppe	2017-03-10	11	-40.7671	-71.1223	713.659	Field	Intermediate	10	0	0
R237	Shrub_steppe	2017-03-10	11	-40.7671	-71.1223	713.659	Field	Intermediate	15	0	0
R237	Shrub_steppe	2017-03-10	11	-40.7671	-71.1223	713.659	Field	Intermediate	20	0	0
R237	Shrub_steppe	2017-03-10	11	-40.7671	-71.1223	713.659	Field	Intermediate	25	0	0
R237	Shrub_steppe	2017-03-10	11	-40.7671	-71.1223	713.659	Field	Intermediate	30	1	15
R237	Shrub_steppe	2017-03-10	11	-40.7671	-71.1223	713.659	Field	Intermediate	35	2	25
R237	Shrub_steppe	2017-03-10	11	-40.7671	-71.1223	713.659	Field	Intermediate	40	1	15
R237	Shrub_steppe	2017-03-10	11	-40.7671	-71.1223	713.659	Field	Intermediate	45	0	0
R237	Shrub_steppe	2017-03-10	11	-40.7671	-71.1223	713.659	Field	Intermediate	50	0	0
R237	Shrub_steppe	2017-03-10	11	-40.7671	-71.1223	713.659	Field	Intermediate	100	0	0
R237	Shrub_steppe	2017-03-10	12	-40.7291	-71.0984	705.969	Field	Low	0	0	0
R237	Shrub_steppe	2017-03-10	12	-40.7291	-71.0984	705.969	Field	Low	5	0	0
R237	Shrub_steppe	2017-03-10	12	-40.7291	-71.0984	705.969	Field	Low	10	0	0
R237	Shrub_steppe	2017-03-10	12	-40.7291	-71.0984	705.969	Field	Low	15	0	0
R237	Shrub_steppe	2017-03-10	12	-40.7291	-71.0984	705.969	Field	Low	20	0	0
R237	Shrub_steppe	2017-03-10	12	-40.7291	-71.0984	705.969	Field	Low	25	0	0
R237	Shrub_steppe	2017-03-10	12	-40.7291	-71.0984	705.969	Field	Low	30	1	15
R237	Shrub_steppe	2017-03-10	12	-40.7291	-71.0984	705.969	Field	Low	35	0	0
R237	Shrub_steppe	2017-03-10	12	-40.7291	-71.0984	705.969	Field	Low	40	0	0
R237	Shrub_steppe	2017-03-10	12	-40.7291	-71.0984	705.969	Field	Low	45	0	0
R237	Shrub_steppe	2017-03-10	12	-40.7291	-71.0984	705.969	Field	Low	50	0	0
R237	Shrub_steppe	2017-03-10	12	-40.7291	-71.0984	705.969	Field	Low	100	0	0
R65-Traful	Shrubland	2017-03-10	13	-40.7188	-71.1394	736.01	Field	High	0	0	0
R65-Traful	Shrubland	2017-03-10	13	-40.7188	-71.1394	736.01	Field	High	5	1	15
R65-Traful	Shrubland	2017-03-10	13	-40.7188	-71.1394	736.01	Field	High	10	1	15
R65-Traful	Shrubland	2017-03-10	13	-40.7188	-71.1394	736.01	Field	High	15	2	25
R65-Traful	Shrubland	2017-03-10	13	-40.7188	-71.1394	736.01	Field	High	20	1	15
R65-Traful	Shrubland	2017-03-10	13	-40.7188	-71.1394	736.01	Field	High	25	1	15
R65-Traful	Shrubland	2017-03-10	13	-40.7188	-71.1394	736.01	Field	High	30	0	0
R65-Traful	Shrubland	2017-03-10	13	-40.7188	-71.1394	736.01	Field	High	35	0	0
R65-Traful	Shrubland	2017-03-10	13	-40.7188	-71.1394	736.01	Field	High	40	1	15
R65-Traful	Shrubland	2017-03-10	13	-40.7188	-71.1394	736.01	Field	High	45	0	0
R65-Traful	Shrubland	2017-03-10	13	-40.7188	-71.1394	736.01	Field	High	50	1	15
R65-Traful	Shrubland	2017-03-10	13	-40.7188	-71.1394	736.01	Field	High	100	1	15
R65-Traful	Shrubland	2017-03-10	14	-40.6934	-71.1648	748.506	Field	Low	0	0	0
R65-Traful	Shrubland	2017-03-10	14	-40.6934	-71.1648	748.506	Field	Low	5	0	0
R65-Traful	Shrubland	2017-03-10	14	-40.6934	-71.1648	748.506	Field	Low	10	0	0
R65-Traful	Shrubland	2017-03-10	14	-40.6934	-71.1648	748.506	Field	Low	15	0	0
R65-Traful	Shrubland	2017-03-10	14	-40.6934	-71.1648	748.506	Field	Low	20	0	0
R65-Traful	Shrubland	2017-03-10	14	-40.6934	-71.1648	748.506	Field	Low	25	0	0
R65-Traful	Shrubland	2017-03-10	14	-40.6934	-71.1648	748.506	Field	Low	30	0	0
R65-Traful	Shrubland	2017-03-10	14	-40.6934	-71.1648	748.506	Field	Low	35	0	0
R65-Traful	Shrubland	2017-03-10	14	-40.6934	-71.1648	748.506	Field	Low	40	0	0
R65-Traful	Shrubland	2017-03-10	14	-40.6934	-71.1648	748.506	Field	Low	45	0	0
R65-Traful	Shrubland	2017-03-10	14	-40.6934	-71.1648	748.506	Field	Low	50	0	0
R65-Traful	Shrubland	2017-03-10	14	-40.6934	-71.1648	748.506	Field	Low	100	0	0
R65-Traful	Shrubland	2017-03-10	15	-40.7241	-71.0948	706.449	Field	Low	0	0	0
R65-Traful	Shrubland	2017-03-10	15	-40.7241	-71.0948	706.449	Field	Low	5	0	0
R65-Traful	Shrubland	2017-03-10	15	-40.7241	-71.0948	706.449	Field	Low	10	0	0
R65-Traful	Shrubland	2017-03-10	15	-40.7241	-71.0948	706.449	Field	Low	15	0	0
R65-Traful	Shrubland	2017-03-10	15	-40.7241	-71.0948	706.449	Field	Low	20	0	0
R65-Traful	Shrubland	2017-03-10	15	-40.7241	-71.0948	706.449	Field	Low	25	0	0
R65-Traful	Shrubland	2017-03-10	15	-40.7241	-71.0948	706.449	Field	Low	30	0	0
R65-Traful	Shrubland	2017-03-10	15	-40.7241	-71.0948	706.449	Field	Low	35	0	0
R65-Traful	Shrubland	2017-03-10	15	-40.7241	-71.0948	706.449	Field	Low	40	0	0
R65-Traful	Shrubland	2017-03-10	15	-40.7241	-71.0948	706.449	Field	Low	45	0	0
R65-Traful	Shrubland	2017-03-10	15	-40.7241	-71.0948	706.449	Field	Low	50	0	0
R65-Traful	Shrubland	2017-03-10	15	-40.7241	-71.0948	706.449	Field	Low	100	0	0
Rex40	Grassy_steppe	2017-03-15	17	-41.4639	-70.6555	982.345	Field	High	0	1	15
Rex40	Grassy_steppe	2017-03-15	17	-41.4639	-70.6555	982.345	Field	High	5	1	15
Rex40	Grassy_steppe	2017-03-15	17	-41.4639	-70.6555	982.345	Field	High	10	1	15
Rex40	Grassy_steppe	2017-03-15	17	-41.4639	-70.6555	982.345	Field	High	15	0	0
Rex40	Grassy_steppe	2017-03-15	17	-41.4639	-70.6555	982.345	Field	High	20	1	15
Rex40	Grassy_steppe	2017-03-15	17	-41.4639	-70.6555	982.345	Field	High	25	2	25
Rex40	Grassy_steppe	2017-03-15	17	-41.4639	-70.6555	982.345	Field	High	30	1	15
Rex40	Grassy_steppe	2017-03-15	17	-41.4639	-70.6555	982.345	Field	High	35	0	0
Rex40	Grassy_steppe	2017-03-15	17	-41.4639	-70.6555	982.345	Field	High	40	0	0
Rex40	Grassy_steppe	2017-03-15	17	-41.4639	-70.6555	982.345	Field	High	45	0	0
Rex40	Grassy_steppe	2017-03-15	17	-41.4639	-70.6555	982.345	Field	High	50	0	0
Rex40	Grassy_steppe	2017-03-15	17	-41.4639	-70.6555	982.345	Field	High	100	0	0
Rex40	Grassy_steppe	2017-03-15	18	-41.4334	-70.6916	1003.98	Field	Intermediate	0	0	0
Rex40	Grassy_steppe	2017-03-15	18	-41.4334	-70.6916	1003.98	Field	Intermediate	5	0	0
Rex40	Grassy_steppe	2017-03-15	18	-41.4334	-70.6916	1003.98	Field	Intermediate	10	0	0
Rex40	Grassy_steppe	2017-03-15	18	-41.4334	-70.6916	1003.98	Field	Intermediate	15	0	0
Rex40	Grassy_steppe	2017-03-15	18	-41.4334	-70.6916	1003.98	Field	Intermediate	20	0	0
Rex40	Grassy_steppe	2017-03-15	18	-41.4334	-70.6916	1003.98	Field	Intermediate	25	0	0
Rex40	Grassy_steppe	2017-03-15	18	-41.4334	-70.6916	1003.98	Field	Intermediate	30	0	0
Rex40	Grassy_steppe	2017-03-15	18	-41.4334	-70.6916	1003.98	Field	Intermediate	35	0	0
Rex40	Grassy_steppe	2017-03-15	18	-41.4334	-70.6916	1003.98	Field	Intermediate	40	0	0
Rex40	Grassy_steppe	2017-03-15	18	-41.4334	-70.6916	1003.98	Field	Intermediate	45	0	0
Rex40	Grassy_steppe	2017-03-15	18	-41.4334	-70.6916	1003.98	Field	Intermediate	50	0	0
Rex40	Grassy_steppe	2017-03-15	18	-41.4334	-70.6916	1003.98	Field	Intermediate	100	0	0
Rex40	Grassy_steppe	2017-03-15	19	-41.4334	-70.6916	1003.98	Field	Intermediate	0	0	0
Rex40	Grassy_steppe	2017-03-15	19	-41.4334	-70.6916	1003.98	Field	Intermediate	5	0	0
Rex40	Grassy_steppe	2017-03-15	19	-41.4334	-70.6916	1003.98	Field	Intermediate	10	0	0
Rex40	Grassy_steppe	2017-03-15	19	-41.4334	-70.6916	1003.98	Field	Intermediate	15	0	0
Rex40	Grassy_steppe	2017-03-15	19	-41.4334	-70.6916	1003.98	Field	Intermediate	20	0	0
Rex40	Grassy_steppe	2017-03-15	19	-41.4334	-70.6916	1003.98	Field	Intermediate	25	0	0
Rex40	Grassy_steppe	2017-03-15	19	-41.4334	-70.6916	1003.98	Field	Intermediate	30	1	15
Rex40	Grassy_steppe	2017-03-15	19	-41.4334	-70.6916	1003.98	Field	Intermediate	35	0	0
Rex40	Grassy_steppe	2017-03-15	19	-41.4334	-70.6916	1003.98	Field	Intermediate	40	0	0
Rex40	Grassy_steppe	2017-03-15	19	-41.4334	-70.6916	1003.98	Field	Intermediate	45	0	0
Rex40	Grassy_steppe	2017-03-15	19	-41.4334	-70.6916	1003.98	Field	Intermediate	50	0	0
Rex40	Grassy_steppe	2017-03-15	19	-41.4334	-70.6916	1003.98	Field	Intermediate	100	0	0
Rex40	Wet_meadow	2017-03-15	20	-41.3498	-70.696	1095.54	Field	High	0	2	25
Rex40	Wet_meadow	2017-03-15	20	-41.3498	-70.696	1095.54	Field	High	5	0	0
Rex40	Wet_meadow	2017-03-15	20	-41.3498	-70.696	1095.54	Field	High	10	0	0
Rex40	Wet_meadow	2017-03-15	20	-41.3498	-70.696	1095.54	Field	High	15	0	0
Rex40	Wet_meadow	2017-03-15	20	-41.3498	-70.696	1095.54	Field	High	20	0	0
Rex40	Wet_meadow	2017-03-15	20	-41.3498	-70.696	1095.54	Field	High	25	0	0
Rex40	Wet_meadow	2017-03-15	20	-41.3498	-70.696	1095.54	Field	High	30	0	0
Rex40	Wet_meadow	2017-03-15	20	-41.3498	-70.696	1095.54	Field	High	35	0	0
Rex40	Wet_meadow	2017-03-15	20	-41.3498	-70.696	1095.54	Field	High	40	0	0
Rex40	Wet_meadow	2017-03-15	20	-41.3498	-70.696	1095.54	Field	High	45	0	0
Rex40	Wet_meadow	2017-03-15	20	-41.3498	-70.696	1095.54	Field	High	50	0	0
Rex40	Wet_meadow	2017-03-15	20	-41.3498	-70.696	1095.54	Field	High	100	0	0
Rex40	Grassy_steppe	2017-03-15	21	-41.3088	-70.7034	1049.64	Field	Intermediate	0	0	0
Rex40	Grassy_steppe	2017-03-15	21	-41.3088	-70.7034	1049.64	Field	Intermediate	5	0	0
Rex40	Grassy_steppe	2017-03-15	21	-41.3088	-70.7034	1049.64	Field	Intermediate	10	0	0
Rex40	Grassy_steppe	2017-03-15	21	-41.3088	-70.7034	1049.64	Field	Intermediate	15	0	0
Rex40	Grassy_steppe	2017-03-15	21	-41.3088	-70.7034	1049.64	Field	Intermediate	20	0	0
Rex40	Grassy_steppe	2017-03-15	21	-41.3088	-70.7034	1049.64	Field	Intermediate	25	0	0
Rex40	Grassy_steppe	2017-03-15	21	-41.3088	-70.7034	1049.64	Field	Intermediate	30	0	0
Rex40	Grassy_steppe	2017-03-15	21	-41.3088	-70.7034	1049.64	Field	Intermediate	35	0	0
Rex40	Grassy_steppe	2017-03-15	21	-41.3088	-70.7034	1049.64	Field	Intermediate	40	0	0
Rex40	Grassy_steppe	2017-03-15	21	-41.3088	-70.7034	1049.64	Field	Intermediate	45	0	0
Rex40	Grassy_steppe	2017-03-15	21	-41.3088	-70.7034	1049.64	Field	Intermediate	50	0	0
Rex40	Grassy_steppe	2017-03-15	21	-41.3088	-70.7034	1049.64	Field	Intermediate	100	0	0
Rex40	Grassy_steppe	2017-03-15	23	-41.2676	-70.6945	1024.64	Field	Intermediate	0	1	15
Rex40	Grassy_steppe	2017-03-15	23	-41.2676	-70.6945	1024.64	Field	Intermediate	5	1	15
Rex40	Grassy_steppe	2017-03-15	23	-41.2676	-70.6945	1024.64	Field	Intermediate	10	2	25
Rex40	Grassy_steppe	2017-03-15	23	-41.2676	-70.6945	1024.64	Field	Intermediate	15	2	25
Rex40	Grassy_steppe	2017-03-15	23	-41.2676	-70.6945	1024.64	Field	Intermediate	20	2	25
Rex40	Grassy_steppe	2017-03-15	23	-41.2676	-70.6945	1024.64	Field	Intermediate	25	1	15
Rex40	Grassy_steppe	2017-03-15	23	-41.2676	-70.6945	1024.64	Field	Intermediate	30	1	15
Rex40	Grassy_steppe	2017-03-15	23	-41.2676	-70.6945	1024.64	Field	Intermediate	35	1	15
Rex40	Grassy_steppe	2017-03-15	23	-41.2676	-70.6945	1024.64	Field	Intermediate	40	2	25
Rex40	Grassy_steppe	2017-03-15	23	-41.2676	-70.6945	1024.64	Field	Intermediate	45	2	25
Rex40	Grassy_steppe	2017-03-15	23	-41.2676	-70.6945	1024.64	Field	Intermediate	50	2	25
Rex40	Grassy_steppe	2017-03-15	23	-41.2676	-70.6945	1024.64	Field	Intermediate	100	0	0
Rex40	Grassy_steppe	2017-03-15	24	-41.2278	-70.6776	1010.46	Field	Intermediate	0	0	0
Rex40	Grassy_steppe	2017-03-15	24	-41.2278	-70.6776	1010.46	Field	Intermediate	5	2	25
Rex40	Grassy_steppe	2017-03-15	24	-41.2278	-70.6776	1010.46	Field	Intermediate	10	0	0
Rex40	Grassy_steppe	2017-03-15	24	-41.2278	-70.6776	1010.46	Field	Intermediate	15	2	25
Rex40	Grassy_steppe	2017-03-15	24	-41.2278	-70.6776	1010.46	Field	Intermediate	20	0	0
Rex40	Grassy_steppe	2017-03-15	24	-41.2278	-70.6776	1010.46	Field	Intermediate	25	0	0
Rex40	Grassy_steppe	2017-03-15	24	-41.2278	-70.6776	1010.46	Field	Intermediate	30	0	0
Rex40	Grassy_steppe	2017-03-15	24	-41.2278	-70.6776	1010.46	Field	Intermediate	35	0	0
Rex40	Grassy_steppe	2017-03-15	24	-41.2278	-70.6776	1010.46	Field	Intermediate	40	0	0
Rex40	Grassy_steppe	2017-03-15	24	-41.2278	-70.6776	1010.46	Field	Intermediate	45	0	0
Rex40	Grassy_steppe	2017-03-15	24	-41.2278	-70.6776	1010.46	Field	Intermediate	50	0	0
Rex40	Grassy_steppe	2017-03-15	24	-41.2278	-70.6776	1010.46	Field	Intermediate	100	0	0
Rex40	Grassy_steppe	2017-03-15	25	-41.1878	-70.6877	1002.05	Field	Intermediate	0	4	75
Rex40	Grassy_steppe	2017-03-15	25	-41.1878	-70.6877	1002.05	Field	Intermediate	5	4	75
Rex40	Grassy_steppe	2017-03-15	25	-41.1878	-70.6877	1002.05	Field	Intermediate	10	0	0
Rex40	Grassy_steppe	2017-03-15	25	-41.1878	-70.6877	1002.05	Field	Intermediate	15	0	0
Rex40	Grassy_steppe	2017-03-15	25	-41.1878	-70.6877	1002.05	Field	Intermediate	20	0	0
Rex40	Grassy_steppe	2017-03-15	25	-41.1878	-70.6877	1002.05	Field	Intermediate	25	0	0
Rex40	Grassy_steppe	2017-03-15	25	-41.1878	-70.6877	1002.05	Field	Intermediate	30	0	0
Rex40	Grassy_steppe	2017-03-15	25	-41.1878	-70.6877	1002.05	Field	Intermediate	35	0	0
Rex40	Grassy_steppe	2017-03-15	25	-41.1878	-70.6877	1002.05	Field	Intermediate	40	0	0
Rex40	Grassy_steppe	2017-03-15	25	-41.1878	-70.6877	1002.05	Field	Intermediate	45	0	0
Rex40	Grassy_steppe	2017-03-15	25	-41.1878	-70.6877	1002.05	Field	Intermediate	50	0	0
Rex40	Grassy_steppe	2017-03-15	25	-41.1878	-70.6877	1002.05	Field	Intermediate	100	2	25
Rex40	Grassy_steppe	2017-03-15	26	-41.1502	-70.6809	981.384	Field	High	0	1	15
Rex40	Grassy_steppe	2017-03-15	26	-41.1502	-70.6809	981.384	Field	High	5	3	50
Rex40	Grassy_steppe	2017-03-15	26	-41.1502	-70.6809	981.384	Field	High	10	1	15
Rex40	Grassy_steppe	2017-03-15	26	-41.1502	-70.6809	981.384	Field	High	15	2	25
Rex40	Grassy_steppe	2017-03-15	26	-41.1502	-70.6809	981.384	Field	High	20	2	25
Rex40	Grassy_steppe	2017-03-15	26	-41.1502	-70.6809	981.384	Field	High	25	2	25
Rex40	Grassy_steppe	2017-03-15	26	-41.1502	-70.6809	981.384	Field	High	30	2	25
Rex40	Grassy_steppe	2017-03-15	26	-41.1502	-70.6809	981.384	Field	High	35	3	50
Rex40	Grassy_steppe	2017-03-15	26	-41.1502	-70.6809	981.384	Field	High	40	1	15
Rex40	Grassy_steppe	2017-03-15	26	-41.1502	-70.6809	981.384	Field	High	45	2	25
Rex40	Grassy_steppe	2017-03-15	26	-41.1502	-70.6809	981.384	Field	High	50	2	25
Rex40	Grassy_steppe	2017-03-15	26	-41.1502	-70.6809	981.384	Field	High	100	2	25
Rex40	Shrub_steppe	2017-03-15	27	-41.1215	-70.7017	987.633	Field	Intermediate	0	2	25
Rex40	Shrub_steppe	2017-03-15	27	-41.1215	-70.7017	987.633	Field	Intermediate	5	1	15
Rex40	Shrub_steppe	2017-03-15	27	-41.1215	-70.7017	987.633	Field	Intermediate	10	0	0
Rex40	Shrub_steppe	2017-03-15	27	-41.1215	-70.7017	987.633	Field	Intermediate	15	0	0
Rex40	Shrub_steppe	2017-03-15	27	-41.1215	-70.7017	987.633	Field	Intermediate	20	1	15
Rex40	Shrub_steppe	2017-03-15	27	-41.1215	-70.7017	987.633	Field	Intermediate	25	2	25
Rex40	Shrub_steppe	2017-03-15	27	-41.1215	-70.7017	987.633	Field	Intermediate	30	0	0
Rex40	Shrub_steppe	2017-03-15	27	-41.1215	-70.7017	987.633	Field	Intermediate	35	2	25
Rex40	Shrub_steppe	2017-03-15	27	-41.1215	-70.7017	987.633	Field	Intermediate	40	1	15
Rex40	Shrub_steppe	2017-03-15	27	-41.1215	-70.7017	987.633	Field	Intermediate	45	1	15
Rex40	Shrub_steppe	2017-03-15	27	-41.1215	-70.7017	987.633	Field	Intermediate	50	1	15
Rex40	Shrub_steppe	2017-03-15	27	-41.1215	-70.7017	987.633	Field	Intermediate	100	1	15
R237	Shrub_steppe	2017-03-17	247	-40.6865	-71.0251	743.986	Field	Intermediate	0	2	25
R237	Shrub_steppe	2017-03-17	247	-40.6865	-71.0251	743.986	Field	Intermediate	5	1	2
R237	Shrub_steppe	2017-03-17	247	-40.6865	-71.0251	743.986	Field	Intermediate	10	2	25
R237	Shrub_steppe	2017-03-17	247	-40.6865	-71.0251	743.986	Field	Intermediate	15	1	12
R237	Shrub_steppe	2017-03-17	247	-40.6865	-71.0251	743.986	Field	Intermediate	20	2	25
R237	Shrub_steppe	2017-03-17	247	-40.6865	-71.0251	743.986	Field	Intermediate	25	2	25
R237	Shrub_steppe	2017-03-17	247	-40.6865	-71.0251	743.986	Field	Intermediate	30	4	75
R237	Shrub_steppe	2017-03-17	247	-40.6865	-71.0251	743.986	Field	Intermediate	35	2	25
R237	Shrub_steppe	2017-03-17	247	-40.6865	-71.0251	743.986	Field	Intermediate	40	4	75
R237	Shrub_steppe	2017-03-17	247	-40.6865	-71.0251	743.986	Field	Intermediate	45	5	100
R237	Shrub_steppe	2017-03-17	247	-40.6865	-71.0251	743.986	Field	Intermediate	50	5	100
R237	Shrub_steppe	2017-03-17	247	-40.6865	-71.0251	743.986	Field	Intermediate	100	4	75
R237	Grassy_steppe	2017-03-17	248	-40.6542	-71.0001	751.42	Field	High	0	3	50
R237	Grassy_steppe	2017-03-17	248	-40.6542	-71.0001	751.42	Field	High	5	3	50
R237	Grassy_steppe	2017-03-17	248	-40.6542	-71.0001	751.42	Field	High	10	5	100
R237	Grassy_steppe	2017-03-17	248	-40.6542	-71.0001	751.42	Field	High	15	5	100
R237	Grassy_steppe	2017-03-17	248	-40.6542	-71.0001	751.42	Field	High	20	4	75
R237	Grassy_steppe	2017-03-17	248	-40.6542	-71.0001	751.42	Field	High	25	4	75
R237	Grassy_steppe	2017-03-17	248	-40.6542	-71.0001	751.42	Field	High	30	2	25
R237	Grassy_steppe	2017-03-17	248	-40.6542	-71.0001	751.42	Field	High	35	4	75
R237	Grassy_steppe	2017-03-17	248	-40.6542	-71.0001	751.42	Field	High	40	4	75
R237	Grassy_steppe	2017-03-17	248	-40.6542	-71.0001	751.42	Field	High	45	4	75
R237	Grassy_steppe	2017-03-17	248	-40.6542	-71.0001	751.42	Field	High	50	2	25
R237	Grassy_steppe	2017-03-17	248	-40.6542	-71.0001	751.42	Field	High	100	2	25
R237	Grassy_steppe	2017-03-17	249	-40.6178	-70.9813	739.803	Field	High	0	2	25
R237	Grassy_steppe	2017-03-17	249	-40.6178	-70.9813	739.803	Field	High	5	4	75
R237	Grassy_steppe	2017-03-17	249	-40.6178	-70.9813	739.803	Field	High	10	5	100
R237	Grassy_steppe	2017-03-17	249	-40.6178	-70.9813	739.803	Field	High	15	2	25
R237	Grassy_steppe	2017-03-17	249	-40.6178	-70.9813	739.803	Field	High	20	2	25
R237	Grassy_steppe	2017-03-17	249	-40.6178	-70.9813	739.803	Field	High	25	4	75
R237	Grassy_steppe	2017-03-17	249	-40.6178	-70.9813	739.803	Field	High	30	4	75
R237	Grassy_steppe	2017-03-17	249	-40.6178	-70.9813	739.803	Field	High	35	2	25
R237	Grassy_steppe	2017-03-17	249	-40.6178	-70.9813	739.803	Field	High	40	4	75
R237	Grassy_steppe	2017-03-17	249	-40.6178	-70.9813	739.803	Field	High	45	3	50
R237	Grassy_steppe	2017-03-17	249	-40.6178	-70.9813	739.803	Field	High	50	2	25
R237	Grassy_steppe	2017-03-17	249	-40.6178	-70.9813	739.803	Field	High	100	1	15
R237	Grassy_steppe	2017-03-17	251	-40.6008	-70.9578	905.841	Field	High	0	3	75
R237	Grassy_steppe	2017-03-17	251	-40.6008	-70.9578	905.841	Field	High	5	5	100
R237	Grassy_steppe	2017-03-17	251	-40.6008	-70.9578	905.841	Field	High	10	3	50
R237	Grassy_steppe	2017-03-17	251	-40.6008	-70.9578	905.841	Field	High	15	3	50
R237	Grassy_steppe	2017-03-17	251	-40.6008	-70.9578	905.841	Field	High	20	4	75
R237	Grassy_steppe	2017-03-17	251	-40.6008	-70.9578	905.841	Field	High	25	4	75
R237	Grassy_steppe	2017-03-17	251	-40.6008	-70.9578	905.841	Field	High	30	2	25
R237	Grassy_steppe	2017-03-17	251	-40.6008	-70.9578	905.841	Field	High	35	3	50
R237	Grassy_steppe	2017-03-17	251	-40.6008	-70.9578	905.841	Field	High	40	3	50
R237	Grassy_steppe	2017-03-17	251	-40.6008	-70.9578	905.841	Field	High	45	4	75
R237	Grassy_steppe	2017-03-17	251	-40.6008	-70.9578	905.841	Field	High	50	3	50
R237	Grassy_steppe	2017-03-17	251	-40.6008	-70.9578	905.841	Field	High	100	3	50
R237	Grassy_steppe	2017-03-17	252	-40.5983	-70.9142	846.019	Field	High	0	2	25
R237	Grassy_steppe	2017-03-17	252	-40.5983	-70.9142	846.019	Field	High	5	4	75
R237	Grassy_steppe	2017-03-17	252	-40.5983	-70.9142	846.019	Field	High	10	3	50
R237	Grassy_steppe	2017-03-17	252	-40.5983	-70.9142	846.019	Field	High	15	3	50
R237	Grassy_steppe	2017-03-17	252	-40.5983	-70.9142	846.019	Field	High	20	2	25
R237	Grassy_steppe	2017-03-17	252	-40.5983	-70.9142	846.019	Field	High	25	2	25
R237	Grassy_steppe	2017-03-17	252	-40.5983	-70.9142	846.019	Field	High	30	1	5
R237	Grassy_steppe	2017-03-17	252	-40.5983	-70.9142	846.019	Field	High	35	1	5
R237	Grassy_steppe	2017-03-17	252	-40.5983	-70.9142	846.019	Field	High	40	2	25
R237	Grassy_steppe	2017-03-17	252	-40.5983	-70.9142	846.019	Field	High	45	1	2
R237	Grassy_steppe	2017-03-17	252	-40.5983	-70.9142	846.019	Field	High	50	2	25
R237	Grassy_steppe	2017-03-17	252	-40.5983	-70.9142	846.019	Field	High	100	1	15
R237	Grassy_steppe	2017-03-17	253	-40.5787	-70.8771	773.897	Field	High	0	2	25
R237	Grassy_steppe	2017-03-17	253	-40.5787	-70.8771	773.897	Field	High	5	3	50
R237	Grassy_steppe	2017-03-17	253	-40.5787	-70.8771	773.897	Field	High	10	5	100
R237	Grassy_steppe	2017-03-17	253	-40.5787	-70.8771	773.897	Field	High	15	5	100
R237	Grassy_steppe	2017-03-17	253	-40.5787	-70.8771	773.897	Field	High	20	2	25
R237	Grassy_steppe	2017-03-17	253	-40.5787	-70.8771	773.897	Field	High	25	2	25
R237	Grassy_steppe	2017-03-17	253	-40.5787	-70.8771	773.897	Field	High	30	2	25
R237	Grassy_steppe	2017-03-17	253	-40.5787	-70.8771	773.897	Field	High	35	2	25
R237	Grassy_steppe	2017-03-17	253	-40.5787	-70.8771	773.897	Field	High	40	2	25
R237	Grassy_steppe	2017-03-17	253	-40.5787	-70.8771	773.897	Field	High	45	1	5
R237	Grassy_steppe	2017-03-17	253	-40.5787	-70.8771	773.897	Field	High	50	0	0
R237	Grassy_steppe	2017-03-17	253	-40.5787	-70.8771	773.897	Field	High	100	1	15
R237	Shrub_steppe	2017-03-17	254	-40.5696	-70.8234	732.84	Field	High	0	3	50
R237	Shrub_steppe	2017-03-17	254	-40.5696	-70.8234	732.84	Field	High	5	4	75
R237	Shrub_steppe	2017-03-17	254	-40.5696	-70.8234	732.84	Field	High	10	3	50
R237	Shrub_steppe	2017-03-17	254	-40.5696	-70.8234	732.84	Field	High	15	2	25
R237	Shrub_steppe	2017-03-17	254	-40.5696	-70.8234	732.84	Field	High	20	3	50
R237	Shrub_steppe	2017-03-17	254	-40.5696	-70.8234	732.84	Field	High	25	4	75
R237	Shrub_steppe	2017-03-17	254	-40.5696	-70.8234	732.84	Field	High	30	5	100
R237	Shrub_steppe	2017-03-17	254	-40.5696	-70.8234	732.84	Field	High	35	5	100
R237	Shrub_steppe	2017-03-17	254	-40.5696	-70.8234	732.84	Field	High	40	2	25
R237	Shrub_steppe	2017-03-17	254	-40.5696	-70.8234	732.84	Field	High	45	4	75
R237	Shrub_steppe	2017-03-17	254	-40.5696	-70.8234	732.84	Field	High	50	3	50
R237	Shrub_steppe	2017-03-17	254	-40.5696	-70.8234	732.84	Field	High	100	2	50
R237	Shrub_steppe	2017-03-17	255	-40.5664	-70.7706	846.784	Field	High	0	2	25
R237	Shrub_steppe	2017-03-17	255	-40.5664	-70.7706	846.784	Field	High	5	4	75
R237	Shrub_steppe	2017-03-17	255	-40.5664	-70.7706	846.784	Field	High	10	3	50
R237	Shrub_steppe	2017-03-17	255	-40.5664	-70.7706	846.784	Field	High	15	2	25
R237	Shrub_steppe	2017-03-17	255	-40.5664	-70.7706	846.784	Field	High	20	2	25
R237	Shrub_steppe	2017-03-17	255	-40.5664	-70.7706	846.784	Field	High	25	2	25
R237	Shrub_steppe	2017-03-17	255	-40.5664	-70.7706	846.784	Field	High	30	1	3
R237	Shrub_steppe	2017-03-17	255	-40.5664	-70.7706	846.784	Field	High	35	2	25
R237	Shrub_steppe	2017-03-17	255	-40.5664	-70.7706	846.784	Field	High	40	1	6
R237	Shrub_steppe	2017-03-17	255	-40.5664	-70.7706	846.784	Field	High	45	1	4
R237	Shrub_steppe	2017-03-17	255	-40.5664	-70.7706	846.784	Field	High	50	0	0
R237	Shrub_steppe	2017-03-17	255	-40.5664	-70.7706	846.784	Field	High	100	1	15
R237	Shrub_steppe	2017-03-17	256	-40.5396	-70.7209	806.502	Field	Intermediate	0	3	50
R237	Shrub_steppe	2017-03-17	256	-40.5396	-70.7209	806.502	Field	Intermediate	5	3	50
R237	Shrub_steppe	2017-03-17	256	-40.5396	-70.7209	806.502	Field	Intermediate	10	1	4
R237	Shrub_steppe	2017-03-17	256	-40.5396	-70.7209	806.502	Field	Intermediate	15	1	14
R237	Shrub_steppe	2017-03-17	256	-40.5396	-70.7209	806.502	Field	Intermediate	20	1	6
R237	Shrub_steppe	2017-03-17	256	-40.5396	-70.7209	806.502	Field	Intermediate	25	4	75
R237	Shrub_steppe	2017-03-17	256	-40.5396	-70.7209	806.502	Field	Intermediate	30	3	50
R237	Shrub_steppe	2017-03-17	256	-40.5396	-70.7209	806.502	Field	Intermediate	35	1	6
R237	Shrub_steppe	2017-03-17	256	-40.5396	-70.7209	806.502	Field	Intermediate	40	2	25
R237	Shrub_steppe	2017-03-17	256	-40.5396	-70.7209	806.502	Field	Intermediate	45	3	50
R237	Shrub_steppe	2017-03-17	256	-40.5396	-70.7209	806.502	Field	Intermediate	50	2	25
R237	Shrub_steppe	2017-03-17	256	-40.5396	-70.7209	806.502	Field	Intermediate	100	0	0
R237	Shrub_steppe	2017-03-17	257	-40.5061	-70.6842	830.956	Field	Intermediate	0	3	50
R237	Shrub_steppe	2017-03-17	257	-40.5061	-70.6842	830.956	Field	Intermediate	5	3	50
R237	Shrub_steppe	2017-03-17	257	-40.5061	-70.6842	830.956	Field	Intermediate	10	2	25
R237	Shrub_steppe	2017-03-17	257	-40.5061	-70.6842	830.956	Field	Intermediate	15	2	25
R237	Shrub_steppe	2017-03-17	257	-40.5061	-70.6842	830.956	Field	Intermediate	20	3	50
R237	Shrub_steppe	2017-03-17	257	-40.5061	-70.6842	830.956	Field	Intermediate	25	3	50
R237	Shrub_steppe	2017-03-17	257	-40.5061	-70.6842	830.956	Field	Intermediate	30	4	75
R237	Shrub_steppe	2017-03-17	257	-40.5061	-70.6842	830.956	Field	Intermediate	35	3	50
R237	Shrub_steppe	2017-03-17	257	-40.5061	-70.6842	830.956	Field	Intermediate	40	2	25
R237	Shrub_steppe	2017-03-17	257	-40.5061	-70.6842	830.956	Field	Intermediate	45	4	75
R237	Shrub_steppe	2017-03-17	257	-40.5061	-70.6842	830.956	Field	Intermediate	50	3	50
R237	Shrub_steppe	2017-03-17	257	-40.5061	-70.6842	830.956	Field	Intermediate	100	2	50
R237	Shrub_steppe	2017-03-17	258	-40.4714	-70.6582	636.372	Field	Intermediate	0	4	75
R237	Shrub_steppe	2017-03-17	258	-40.4714	-70.6582	636.372	Field	Intermediate	5	4	75
R237	Shrub_steppe	2017-03-17	258	-40.4714	-70.6582	636.372	Field	Intermediate	10	4	75
R237	Shrub_steppe	2017-03-17	258	-40.4714	-70.6582	636.372	Field	Intermediate	15	3	50
R237	Shrub_steppe	2017-03-17	258	-40.4714	-70.6582	636.372	Field	Intermediate	20	3	50
R237	Shrub_steppe	2017-03-17	258	-40.4714	-70.6582	636.372	Field	Intermediate	25	4	75
R237	Shrub_steppe	2017-03-17	258	-40.4714	-70.6582	636.372	Field	Intermediate	30	3	50
R237	Shrub_steppe	2017-03-17	258	-40.4714	-70.6582	636.372	Field	Intermediate	35	1	10
R237	Shrub_steppe	2017-03-17	258	-40.4714	-70.6582	636.372	Field	Intermediate	40	1	8
R237	Shrub_steppe	2017-03-17	258	-40.4714	-70.6582	636.372	Field	Intermediate	45	1	14
R237	Shrub_steppe	2017-03-17	258	-40.4714	-70.6582	636.372	Field	Intermediate	50	1	10
R237	Shrub_steppe	2017-03-17	258	-40.4714	-70.6582	636.372	Field	Intermediate	100	1	15
R237	Shrub_steppe	2017-03-17	261	-40.4155	-70.5586	1062.63	Field	Intermediate	0	1	15
R237	Shrub_steppe	2017-03-17	261	-40.4155	-70.5586	1062.63	Field	Intermediate	5	0	0
R237	Shrub_steppe	2017-03-17	261	-40.4155	-70.5586	1062.63	Field	Intermediate	10	0	0
R237	Shrub_steppe	2017-03-17	261	-40.4155	-70.5586	1062.63	Field	Intermediate	15	4	0
R237	Shrub_steppe	2017-03-17	261	-40.4155	-70.5586	1062.63	Field	Intermediate	20	5	100
R237	Shrub_steppe	2017-03-17	261	-40.4155	-70.5586	1062.63	Field	Intermediate	25	2	25
R237	Shrub_steppe	2017-03-17	261	-40.4155	-70.5586	1062.63	Field	Intermediate	30	4	75
R237	Shrub_steppe	2017-03-17	261	-40.4155	-70.5586	1062.63	Field	Intermediate	35	5	100
R237	Shrub_steppe	2017-03-17	261	-40.4155	-70.5586	1062.63	Field	Intermediate	40	4	75
R237	Shrub_steppe	2017-03-17	261	-40.4155	-70.5586	1062.63	Field	Intermediate	45	3	50
R237	Shrub_steppe	2017-03-17	261	-40.4155	-70.5586	1062.63	Field	Intermediate	50	2	25
R237	Shrub_steppe	2017-03-17	261	-40.4155	-70.5586	1062.63	Field	Intermediate	100	1	25
R237	Shrub_steppe	2017-03-17	262	-40.4208	-70.6085	807.05	Field	High	0	4	75
R237	Shrub_steppe	2017-03-17	262	-40.4208	-70.6085	807.05	Field	High	5	2	25
R237	Shrub_steppe	2017-03-17	262	-40.4208	-70.6085	807.05	Field	High	10	4	75
R237	Shrub_steppe	2017-03-17	262	-40.4208	-70.6085	807.05	Field	High	15	5	100
R237	Shrub_steppe	2017-03-17	262	-40.4208	-70.6085	807.05	Field	High	20	5	100
R237	Shrub_steppe	2017-03-17	262	-40.4208	-70.6085	807.05	Field	High	25	4	75
R237	Shrub_steppe	2017-03-17	262	-40.4208	-70.6085	807.05	Field	High	30	4	75
R237	Shrub_steppe	2017-03-17	262	-40.4208	-70.6085	807.05	Field	High	35	5	100
R237	Shrub_steppe	2017-03-17	262	-40.4208	-70.6085	807.05	Field	High	40	5	100
R237	Shrub_steppe	2017-03-17	262	-40.4208	-70.6085	807.05	Field	High	45	5	100
R237	Shrub_steppe	2017-03-17	262	-40.4208	-70.6085	807.05	Field	High	50	5	100
R237	Shrub_steppe	2017-03-17	262	-40.4208	-70.6085	807.05	Field	High	100	4	75
R23	Shrub_steppe	2017-01-16	575	-41.0558	-71.0215	951.824	Field	Intermediate	0	0	0
R23	Shrub_steppe	2017-01-16	575	-41.0558	-71.0215	951.824	Field	Intermediate	5	0	0
R23	Shrub_steppe	2017-01-16	575	-41.0558	-71.0215	951.824	Field	Intermediate	10	0	0
R23	Shrub_steppe	2017-01-16	575	-41.0558	-71.0215	951.824	Field	Intermediate	15	0	0
R23	Shrub_steppe	2017-01-16	575	-41.0558	-71.0215	951.824	Field	Intermediate	20	0	0
R23	Shrub_steppe	2017-01-16	575	-41.0558	-71.0215	951.824	Field	Intermediate	25	0	0
R23	Shrub_steppe	2017-01-16	575	-41.0558	-71.0215	951.824	Field	Intermediate	30	0	0
R23	Shrub_steppe	2017-01-16	575	-41.0558	-71.0215	951.824	Field	Intermediate	35	0	0
R23	Shrub_steppe	2017-01-16	575	-41.0558	-71.0215	951.824	Field	Intermediate	40	0	0
R23	Shrub_steppe	2017-01-16	575	-41.0558	-71.0215	951.824	Field	Intermediate	45	0	0
R23	Shrub_steppe	2017-01-16	575	-41.0558	-71.0215	951.824	Field	Intermediate	50	0	0
R23	Shrub_steppe	2017-01-16	575	-41.0558	-71.0215	951.824	Field	Intermediate	100	0	0
R23	Shrub_steppe	2017-01-16	576	-41.0732	-70.9767	934.28	Field	Intermediate	0	1	7
R23	Shrub_steppe	2017-01-16	576	-41.0732	-70.9767	934.28	Field	Intermediate	5	0	0
R23	Shrub_steppe	2017-01-16	576	-41.0732	-70.9767	934.28	Field	Intermediate	10	0	0
R23	Shrub_steppe	2017-01-16	576	-41.0732	-70.9767	934.28	Field	Intermediate	15	0	0
R23	Shrub_steppe	2017-01-16	576	-41.0732	-70.9767	934.28	Field	Intermediate	20	0	0
R23	Shrub_steppe	2017-01-16	576	-41.0732	-70.9767	934.28	Field	Intermediate	25	1	3
R23	Shrub_steppe	2017-01-16	576	-41.0732	-70.9767	934.28	Field	Intermediate	30	0	0
R23	Shrub_steppe	2017-01-16	576	-41.0732	-70.9767	934.28	Field	Intermediate	35	0	0
R23	Shrub_steppe	2017-01-16	576	-41.0732	-70.9767	934.28	Field	Intermediate	40	0	0
R23	Shrub_steppe	2017-01-16	576	-41.0732	-70.9767	934.28	Field	Intermediate	45	0	0
R23	Shrub_steppe	2017-01-16	576	-41.0732	-70.9767	934.28	Field	Intermediate	100	0	0
R23	Shrub_steppe	2017-01-16	576	-41.0732	-70.9767	934.28	Field	Intermediate	50	0	0
R23	Shrub_steppe	2017-01-16	577	-41.1057	-70.9292	994.362	Field	Intermediate	0	0	0
R23	Shrub_steppe	2017-01-16	577	-41.1057	-70.9292	994.362	Field	Intermediate	5	0	0
R23	Shrub_steppe	2017-01-16	577	-41.1057	-70.9292	994.362	Field	Intermediate	10	0	0
R23	Shrub_steppe	2017-01-16	577	-41.1057	-70.9292	994.362	Field	Intermediate	15	0	0
R23	Shrub_steppe	2017-01-16	577	-41.1057	-70.9292	994.362	Field	Intermediate	20	0	0
R23	Shrub_steppe	2017-01-16	577	-41.1057	-70.9292	994.362	Field	Intermediate	25	0	0
R23	Shrub_steppe	2017-01-16	577	-41.1057	-70.9292	994.362	Field	Intermediate	30	0	0
R23	Shrub_steppe	2017-01-16	577	-41.1057	-70.9292	994.362	Field	Intermediate	35	0	0
R23	Shrub_steppe	2017-01-16	577	-41.1057	-70.9292	994.362	Field	Intermediate	40	0	0
R23	Shrub_steppe	2017-01-16	577	-41.1057	-70.9292	994.362	Field	Intermediate	45	0	0
R23	Shrub_steppe	2017-01-16	577	-41.1057	-70.9292	994.362	Field	Intermediate	50	0	0
R23	Shrub_steppe	2017-01-16	577	-41.1057	-70.9292	994.362	Field	Intermediate	100	0	0
R23	Shrub_steppe	2017-01-16	578	-41.1194	-70.8923	1005.66	Field	High	0	2	25
R23	Shrub_steppe	2017-01-16	578	-41.1194	-70.8923	1005.66	Field	High	5	1	10
R23	Shrub_steppe	2017-01-16	578	-41.1194	-70.8923	1005.66	Field	High	10	0	0
R23	Shrub_steppe	2017-01-16	578	-41.1194	-70.8923	1005.66	Field	High	15	0	0
R23	Shrub_steppe	2017-01-16	578	-41.1194	-70.8923	1005.66	Field	High	20	0	0
R23	Shrub_steppe	2017-01-16	578	-41.1194	-70.8923	1005.66	Field	High	25	0	0
R23	Shrub_steppe	2017-01-16	578	-41.1194	-70.8923	1005.66	Field	High	30	0	0
R23	Shrub_steppe	2017-01-16	578	-41.1194	-70.8923	1005.66	Field	High	35	0	0
R23	Shrub_steppe	2017-01-16	578	-41.1194	-70.8923	1005.66	Field	High	40	0	0
R23	Shrub_steppe	2017-01-16	578	-41.1194	-70.8923	1005.66	Field	High	45	0	0
R23	Shrub_steppe	2017-01-16	578	-41.1194	-70.8923	1005.66	Field	High	50	0	0
R23	Shrub_steppe	2017-01-16	578	-41.1194	-70.8923	1005.66	Field	High	100	0	0
R23	Shrub_steppe	2017-01-16	579	-41.1096	-70.845	989.075	Field	High	0	1	15
R23	Shrub_steppe	2017-01-16	579	-41.1096	-70.845	989.075	Field	High	5	0	0
R23	Shrub_steppe	2017-01-16	579	-41.1096	-70.845	989.075	Field	High	10	1	3
R23	Shrub_steppe	2017-01-16	579	-41.1096	-70.845	989.075	Field	High	15	1	1
R23	Shrub_steppe	2017-01-16	579	-41.1096	-70.845	989.075	Field	High	20	1	3
R23	Shrub_steppe	2017-01-16	579	-41.1096	-70.845	989.075	Field	High	25	1	1
R23	Shrub_steppe	2017-01-16	579	-41.1096	-70.845	989.075	Field	High	30	1	8
R23	Shrub_steppe	2017-01-16	579	-41.1096	-70.845	989.075	Field	High	35	0	0
R23	Shrub_steppe	2017-01-16	579	-41.1096	-70.845	989.075	Field	High	40	0	0
R23	Shrub_steppe	2017-01-16	579	-41.1096	-70.845	989.075	Field	High	45	0	0
R23	Shrub_steppe	2017-01-16	579	-41.1096	-70.845	989.075	Field	High	50	0	0
R23	Shrub_steppe	2017-01-16	579	-41.1096	-70.845	989.075	Field	High	100	0	0
R23	Shrub_steppe	2017-01-16	580	-41.1018	-70.8109	964.561	Field	High	0	4	75
R23	Shrub_steppe	2017-01-16	580	-41.1018	-70.8109	964.561	Field	High	5	2	25
R23	Shrub_steppe	2017-01-16	580	-41.1018	-70.8109	964.561	Field	High	10	1	15
R23	Shrub_steppe	2017-01-16	580	-41.1018	-70.8109	964.561	Field	High	15	3	50
R23	Shrub_steppe	2017-01-16	580	-41.1018	-70.8109	964.561	Field	High	20	1	15
R23	Shrub_steppe	2017-01-16	580	-41.1018	-70.8109	964.561	Field	High	25	1	15
R23	Shrub_steppe	2017-01-16	580	-41.1018	-70.8109	964.561	Field	High	30	1	15
R23	Shrub_steppe	2017-01-16	580	-41.1018	-70.8109	964.561	Field	High	35	1	15
R23	Shrub_steppe	2017-01-16	580	-41.1018	-70.8109	964.561	Field	High	40	1	15
R23	Shrub_steppe	2017-01-16	580	-41.1018	-70.8109	964.561	Field	High	45	1	15
R23	Shrub_steppe	2017-01-16	580	-41.1018	-70.8109	964.561	Field	High	50	2	25
R23	Shrub_steppe	2017-01-16	580	-41.1018	-70.8109	964.561	Field	High	100	0	0
R80	Shrub_steppe	2017-01-17	581	-41.1442	-71.173	825.411	Field	Intermediate	0	1	15
R80	Shrub_steppe	2017-01-17	581	-41.1442	-71.173	825.411	Field	Intermediate	5	0	0
R80	Shrub_steppe	2017-01-17	581	-41.1442	-71.173	825.411	Field	Intermediate	10	0	0
R80	Shrub_steppe	2017-01-17	581	-41.1442	-71.173	825.411	Field	Intermediate	15	0	0
R80	Shrub_steppe	2017-01-17	581	-41.1442	-71.173	825.411	Field	Intermediate	20	0	0
R80	Shrub_steppe	2017-01-17	581	-41.1442	-71.173	825.411	Field	Intermediate	25	0	0
R80	Shrub_steppe	2017-01-17	581	-41.1442	-71.173	825.411	Field	Intermediate	30	0	0
R80	Shrub_steppe	2017-01-17	581	-41.1442	-71.173	825.411	Field	Intermediate	35	0	0
R80	Shrub_steppe	2017-01-17	581	-41.1442	-71.173	825.411	Field	Intermediate	40	1	15
R80	Shrub_steppe	2017-01-17	581	-41.1442	-71.173	825.411	Field	Intermediate	45	0	0
R80	Shrub_steppe	2017-01-17	581	-41.1442	-71.173	825.411	Field	Intermediate	50	0	0
R80	Shrub_steppe	2017-01-17	581	-41.1442	-71.173	825.411	Field	Intermediate	100	0	0
R80	Shrub_steppe	2017-01-17	582	-41.1673	-71.1307	845.839	Field	High	0	0	0
R80	Shrub_steppe	2017-01-17	582	-41.1673	-71.1307	845.839	Field	High	5	0	0
R80	Shrub_steppe	2017-01-17	582	-41.1673	-71.1307	845.839	Field	High	10	0	0
R80	Shrub_steppe	2017-01-17	582	-41.1673	-71.1307	845.839	Field	High	15	0	0
R80	Shrub_steppe	2017-01-17	582	-41.1673	-71.1307	845.839	Field	High	20	0	0
R80	Shrub_steppe	2017-01-17	582	-41.1673	-71.1307	845.839	Field	High	25	0	0
R80	Shrub_steppe	2017-01-17	582	-41.1673	-71.1307	845.839	Field	High	30	0	0
R80	Shrub_steppe	2017-01-17	582	-41.1673	-71.1307	845.839	Field	High	35	0	0
R80	Shrub_steppe	2017-01-17	582	-41.1673	-71.1307	845.839	Field	High	40	0	0
R80	Shrub_steppe	2017-01-17	582	-41.1673	-71.1307	845.839	Field	High	45	0	0
R80	Shrub_steppe	2017-01-17	582	-41.1673	-71.1307	845.839	Field	High	50	0	0
R80	Shrub_steppe	2017-01-17	582	-41.1673	-71.1307	845.839	Field	High	100	0	0
R80	Grassy_steppe	2017-01-17	583	-41.1992	-71.1015	865.306	Field	Intermediate	0	0	0
R80	Grassy_steppe	2017-01-17	583	-41.1992	-71.1015	865.306	Field	Intermediate	5	0	0
R80	Grassy_steppe	2017-01-17	583	-41.1992	-71.1015	865.306	Field	Intermediate	10	0	0
R80	Grassy_steppe	2017-01-17	583	-41.1992	-71.1015	865.306	Field	Intermediate	15	0	0
R80	Grassy_steppe	2017-01-17	583	-41.1992	-71.1015	865.306	Field	Intermediate	20	0	0
R80	Grassy_steppe	2017-01-17	583	-41.1992	-71.1015	865.306	Field	Intermediate	25	0	0
R80	Grassy_steppe	2017-01-17	583	-41.1992	-71.1015	865.306	Field	Intermediate	30	0	0
R80	Grassy_steppe	2017-01-17	583	-41.1992	-71.1015	865.306	Field	Intermediate	35	0	0
R80	Grassy_steppe	2017-01-17	583	-41.1992	-71.1015	865.306	Field	Intermediate	40	0	0
R80	Grassy_steppe	2017-01-17	583	-41.1992	-71.1015	865.306	Field	Intermediate	45	0	0
R80	Grassy_steppe	2017-01-17	583	-41.1992	-71.1015	865.306	Field	Intermediate	50	0	0
R80	Grassy_steppe	2017-01-17	583	-41.1992	-71.1015	865.306	Field	Intermediate	100	0	0
R80	Grassy_steppe	2017-01-17	588	-41.2268	-71.0636	1000.85	Field	Intermediate	0	0	0
R80	Grassy_steppe	2017-01-17	588	-41.2268	-71.0636	1000.85	Field	Intermediate	5	0	0
R80	Grassy_steppe	2017-01-17	588	-41.2268	-71.0636	1000.85	Field	Intermediate	10	2	25
R80	Grassy_steppe	2017-01-17	588	-41.2268	-71.0636	1000.85	Field	Intermediate	15	0	0
R80	Grassy_steppe	2017-01-17	588	-41.2268	-71.0636	1000.85	Field	Intermediate	20	0	0
R80	Grassy_steppe	2017-01-17	588	-41.2268	-71.0636	1000.85	Field	Intermediate	25	0	0
R80	Grassy_steppe	2017-01-17	588	-41.2268	-71.0636	1000.85	Field	Intermediate	30	0	0
R80	Grassy_steppe	2017-01-17	588	-41.2268	-71.0636	1000.85	Field	Intermediate	35	0	0
R80	Grassy_steppe	2017-01-17	588	-41.2268	-71.0636	1000.85	Field	Intermediate	40	0	0
R80	Grassy_steppe	2017-01-17	588	-41.2268	-71.0636	1000.85	Field	Intermediate	45	0	0
R80	Grassy_steppe	2017-01-17	588	-41.2268	-71.0636	1000.85	Field	Intermediate	50	0	0
R80	Grassy_steppe	2017-01-17	588	-41.2268	-71.0636	1000.85	Field	Intermediate	100	0	0
R80	Grassy_steppe	2017-01-17	589	-41.2484	-71.0283	1150.09	Field	Intermediate	0	0	0
R80	Grassy_steppe	2017-01-17	589	-41.2484	-71.0283	1150.09	Field	Intermediate	5	0	0
R80	Grassy_steppe	2017-01-17	589	-41.2484	-71.0283	1150.09	Field	Intermediate	10	0	0
R80	Grassy_steppe	2017-01-17	589	-41.2484	-71.0283	1150.09	Field	Intermediate	15	0	0
R80	Grassy_steppe	2017-01-17	589	-41.2484	-71.0283	1150.09	Field	Intermediate	20	0	0
R80	Grassy_steppe	2017-01-17	589	-41.2484	-71.0283	1150.09	Field	Intermediate	25	0	0
R80	Grassy_steppe	2017-01-17	589	-41.2484	-71.0283	1150.09	Field	Intermediate	30	0	0
R80	Grassy_steppe	2017-01-17	589	-41.2484	-71.0283	1150.09	Field	Intermediate	35	0	0
R80	Grassy_steppe	2017-01-17	589	-41.2484	-71.0283	1150.09	Field	Intermediate	40	0	0
R80	Grassy_steppe	2017-01-17	589	-41.2484	-71.0283	1150.09	Field	Intermediate	45	0	0
R80	Shrub_steppe	2017-01-17	589	-41.2484	-71.0283	1150.09	Field	Intermediate	50	0	0
R80	Shrub_steppe	2017-01-17	589	-41.2484	-71.0283	1150.09	Field	Intermediate	100	0	0
R80	Shrub_steppe	2017-01-17	590	-41.2902	-71.0394	1112.12	Field	Intermediate	0	0	0
R80	Shrub_steppe	2017-01-17	590	-41.2902	-71.0394	1112.12	Field	Intermediate	5	0	0
R80	Shrub_steppe	2017-01-17	590	-41.2902	-71.0394	1112.12	Field	Intermediate	10	0	0
R80	Shrub_steppe	2017-01-17	590	-41.2902	-71.0394	1112.12	Field	Intermediate	15	0	0
R80	Shrub_steppe	2017-01-17	590	-41.2902	-71.0394	1112.12	Field	Intermediate	20	0	0
R80	Shrub_steppe	2017-01-17	590	-41.2902	-71.0394	1112.12	Field	Intermediate	25	0	0
R80	Shrub_steppe	2017-01-17	590	-41.2902	-71.0394	1112.12	Field	Intermediate	30	0	0
R80	Shrub_steppe	2017-01-17	590	-41.2902	-71.0394	1112.12	Field	Intermediate	35	0	0
R80	Shrub_steppe	2017-01-17	590	-41.2902	-71.0394	1112.12	Field	Intermediate	40	0	0
R80	Shrub_steppe	2017-01-17	590	-41.2902	-71.0394	1112.12	Field	Intermediate	45	0	0
R80	Shrub_steppe	2017-01-17	590	-41.2902	-71.0394	1112.12	Field	Intermediate	50	0	0
R80	Shrub_steppe	2017-01-17	590	-41.2902	-71.0394	1112.12	Field	Intermediate	100	0	0
R80	Shrub_steppe	2017-01-17	591	-41.3279	-71.0322	1135.19	Field	Intermediate	0	0	0
R80	Shrub_steppe	2017-01-17	591	-41.3279	-71.0322	1135.19	Field	Intermediate	5	0	0
R80	Shrub_steppe	2017-01-17	591	-41.3279	-71.0322	1135.19	Field	Intermediate	10	0	0
R80	Shrub_steppe	2017-01-17	591	-41.3279	-71.0322	1135.19	Field	Intermediate	15	0	0
R80	Shrub_steppe	2017-01-17	591	-41.3279	-71.0322	1135.19	Field	Intermediate	20	0	0
R80	Shrub_steppe	2017-01-17	591	-41.3279	-71.0322	1135.19	Field	Intermediate	25	0	0
R80	Shrub_steppe	2017-01-17	591	-41.3279	-71.0322	1135.19	Field	Intermediate	30	0	0
R80	Shrub_steppe	2017-01-17	591	-41.3279	-71.0322	1135.19	Field	Intermediate	35	0	0
R80	Shrub_steppe	2017-01-17	591	-41.3279	-71.0322	1135.19	Field	Intermediate	40	0	0
R80	Shrub_steppe	2017-01-17	591	-41.3279	-71.0322	1135.19	Field	Intermediate	45	0	0
R80	Shrub_steppe	2017-01-17	591	-41.3279	-71.0322	1135.19	Field	Intermediate	50	0	0
R80	Shrub_steppe	2017-01-17	591	-41.3279	-71.0322	1135.19	Field	Intermediate	100	0	0
R80	Grassy_steppe	2017-01-17	592	-41.4431	-70.9966	1247.91	Field	Low	0	0	0
R80	Grassy_steppe	2017-01-17	592	-41.4431	-70.9966	1247.91	Field	Low	5	0	0
R80	Grassy_steppe	2017-01-17	592	-41.4431	-70.9966	1247.91	Field	Low	10	0	0
R80	Grassy_steppe	2017-01-17	592	-41.4431	-70.9966	1247.91	Field	Low	15	0	0
R80	Grassy_steppe	2017-01-17	592	-41.4431	-70.9966	1247.91	Field	Low	20	0	0
R80	Grassy_steppe	2017-01-17	592	-41.4431	-70.9966	1247.91	Field	Low	25	0	0
R80	Grassy_steppe	2017-01-17	592	-41.4431	-70.9966	1247.91	Field	Low	30	0	0
R80	Grassy_steppe	2017-01-17	592	-41.4431	-70.9966	1247.91	Field	Low	35	0	0
R80	Grassy_steppe	2017-01-17	592	-41.4431	-70.9966	1247.91	Field	Low	40	0	0
R80	Grassy_steppe	2017-01-17	592	-41.4431	-70.9966	1247.91	Field	Low	45	0	0
R80	Grassy_steppe	2017-01-17	592	-41.4431	-70.9966	1247.91	Field	Low	50	0	0
R80	Grassy_steppe	2017-01-17	592	-41.4431	-70.9966	1247.91	Field	Low	100	0	0
R80	Grassy_steppe	2017-01-17	593	-41.406	-71.0104	1173.89	Field	Low	0	0	0
R80	Grassy_steppe	2017-01-17	593	-41.406	-71.0104	1173.89	Field	Low	5	0	0
R80	Grassy_steppe	2017-01-17	593	-41.406	-71.0104	1173.89	Field	Low	10	0	0
R80	Grassy_steppe	2017-01-17	593	-41.406	-71.0104	1173.89	Field	Low	15	0	0
R80	Grassy_steppe	2017-01-17	593	-41.406	-71.0104	1173.89	Field	Low	20	0	0
R80	Grassy_steppe	2017-01-17	593	-41.406	-71.0104	1173.89	Field	Low	25	0	0
R80	Grassy_steppe	2017-01-17	593	-41.406	-71.0104	1173.89	Field	Low	30	0	0
R80	Grassy_steppe	2017-01-17	593	-41.406	-71.0104	1173.89	Field	Low	35	0	0
R80	Grassy_steppe	2017-01-17	593	-41.406	-71.0104	1173.89	Field	Low	40	0	0
R80	Grassy_steppe	2017-01-17	593	-41.406	-71.0104	1173.89	Field	Low	45	0	0
R80	Grassy_steppe	2017-01-17	593	-41.406	-71.0104	1173.89	Field	Low	50	0	0
R80	Grassy_steppe	2017-01-17	593	-41.406	-71.0104	1173.89	Field	Low	100	0	0
R80	Grassy_steppe	2017-01-17	594	-41.4431	-70.9966	1237.81	Field	Low	0	0	0
R80	Grassy_steppe	2017-01-17	594	-41.4431	-70.9966	1237.81	Field	Low	5	0	0
R80	Grassy_steppe	2017-01-17	594	-41.4431	-70.9966	1237.81	Field	Low	10	0	0
R80	Grassy_steppe	2017-01-17	594	-41.4431	-70.9966	1237.81	Field	Low	15	0	0
R80	Grassy_steppe	2017-01-17	594	-41.4431	-70.9966	1237.81	Field	Low	20	0	0
R80	Grassy_steppe	2017-01-17	594	-41.4431	-70.9966	1237.81	Field	Low	25	0	0
R80	Grassy_steppe	2017-01-17	594	-41.4431	-70.9966	1237.81	Field	Low	30	0	0
R80	Grassy_steppe	2017-01-17	594	-41.4431	-70.9966	1237.81	Field	Low	35	0	0
R80	Grassy_steppe	2017-01-17	594	-41.4431	-70.9966	1237.81	Field	Low	40	0	0
R80	Grassy_steppe	2017-01-17	594	-41.4431	-70.9966	1237.81	Field	Low	45	0	0
R80	Grassy_steppe	2017-01-17	594	-41.4431	-70.9966	1237.81	Field	Low	50	0	0
R80	Grassy_steppe	2017-01-17	594	-41.4431	-70.9966	1237.81	Field	Low	100	0	0
R80	Grassy_steppe	2017-01-17	595	-41.4871	-70.9875	1160.19	Field	Low	0	1	15
R80	Grassy_steppe	2017-01-17	595	-41.4871	-70.9875	1160.19	Field	Low	5	0	0
R80	Grassy_steppe	2017-01-17	595	-41.4871	-70.9875	1160.19	Field	Low	10	0	0
R80	Grassy_steppe	2017-01-17	595	-41.4871	-70.9875	1160.19	Field	Low	15	0	0
R80	Grassy_steppe	2017-01-17	595	-41.4871	-70.9875	1160.19	Field	Low	20	0	0
R80	Grassy_steppe	2017-01-17	595	-41.4871	-70.9875	1160.19	Field	Low	25	0	0
R80	Grassy_steppe	2017-01-17	595	-41.4871	-70.9875	1160.19	Field	Low	30	0	0
R80	Grassy_steppe	2017-01-17	595	-41.4871	-70.9875	1160.19	Field	Low	35	0	0
R80	Grassy_steppe	2017-01-17	595	-41.4871	-70.9875	1160.19	Field	Low	40	0	0
R80	Grassy_steppe	2017-01-17	595	-41.4871	-70.9875	1160.19	Field	Low	45	0	0
R80	Grassy_steppe	2017-01-17	595	-41.4871	-70.9875	1160.19	Field	Low	50	0	0
R80	Grassy_steppe	2017-01-17	595	-41.4871	-70.9875	1160.19	Field	Low	100	0	0
R80	Grassy_steppe	2017-01-17	596	-41.5208	-70.9926	1194.31	Field	Low	0	1	15
R80	Grassy_steppe	2017-01-17	596	-41.5208	-70.9926	1194.31	Field	Low	5	0	0
R80	Grassy_steppe	2017-01-17	596	-41.5208	-70.9926	1194.31	Field	Low	10	0	0
R80	Grassy_steppe	2017-01-17	596	-41.5208	-70.9926	1194.31	Field	Low	15	0	0
R80	Grassy_steppe	2017-01-17	596	-41.5208	-70.9926	1194.31	Field	Low	20	0	0
R80	Grassy_steppe	2017-01-17	596	-41.5208	-70.9926	1194.31	Field	Low	25	0	0
R80	Grassy_steppe	2017-01-17	596	-41.5208	-70.9926	1194.31	Field	Low	30	0	0
R80	Grassy_steppe	2017-01-17	596	-41.5208	-70.9926	1194.31	Field	Low	35	0	0
R80	Grassy_steppe	2017-01-17	596	-41.5208	-70.9926	1194.31	Field	Low	40	0	0
R80	Grassy_steppe	2017-01-17	596	-41.5208	-70.9926	1194.31	Field	Low	45	0	0
R80	Grassy_steppe	2017-01-17	596	-41.5208	-70.9926	1194.31	Field	Low	50	0	0
R80	Grassy_steppe	2017-01-17	596	-41.5208	-70.9926	1194.31	Field	Low	100	0	0
R80	Grassy_steppe	2017-01-17	597	-41.5267	-70.9425	1156.1	Field	Low	0	0	0
R80	Grassy_steppe	2017-01-17	597	-41.5267	-70.9425	1156.1	Field	Low	5	0	0
R80	Grassy_steppe	2017-01-17	597	-41.5267	-70.9425	1156.1	Field	Low	10	0	0
R80	Grassy_steppe	2017-01-17	597	-41.5267	-70.9425	1156.1	Field	Low	15	0	0
R80	Grassy_steppe	2017-01-17	597	-41.5267	-70.9425	1156.1	Field	Low	20	0	0
R80	Grassy_steppe	2017-01-17	597	-41.5267	-70.9425	1156.1	Field	Low	25	0	0
R80	Grassy_steppe	2017-01-17	597	-41.5267	-70.9425	1156.1	Field	Low	30	0	0
R80	Grassy_steppe	2017-01-17	597	-41.5267	-70.9425	1156.1	Field	Low	35	0	0
R80	Grassy_steppe	2017-01-17	597	-41.5267	-70.9425	1156.1	Field	Low	40	0	0
R80	Grassy_steppe	2017-01-17	597	-41.5267	-70.9425	1156.1	Field	Low	45	0	0
R80	Grassy_steppe	2017-01-17	597	-41.5267	-70.9425	1156.1	Field	Low	50	0	0
R80	Grassy_steppe	2017-01-17	597	-41.5267	-70.9425	1156.1	Field	Low	100	0	0
R80	Grassy_steppe	2017-01-18	598	-41.5402	-70.8869	1121.26	Field	Intermediate	0	1	15
R80	Grassy_steppe	2017-01-18	598	-41.5402	-70.8869	1121.26	Field	Intermediate	5	1	15
R80	Grassy_steppe	2017-01-18	598	-41.5402	-70.8869	1121.26	Field	Intermediate	10	1	15
R80	Grassy_steppe	2017-01-18	598	-41.5402	-70.8869	1121.26	Field	Intermediate	15	0	0
R80	Grassy_steppe	2017-01-18	598	-41.5402	-70.8869	1121.26	Field	Intermediate	20	1	15
R80	Grassy_steppe	2017-01-18	598	-41.5402	-70.8869	1121.26	Field	Intermediate	25	0	0
R80	Grassy_steppe	2017-01-18	598	-41.5402	-70.8869	1121.26	Field	Intermediate	30	0	0
R80	Grassy_steppe	2017-01-18	598	-41.5402	-70.8869	1121.26	Field	Intermediate	35	0	0
R80	Grassy_steppe	2017-01-18	598	-41.5402	-70.8869	1121.26	Field	Intermediate	40	0	0
R80	Grassy_steppe	2017-01-18	598	-41.5402	-70.8869	1121.26	Field	Intermediate	45	0	0
R80	Grassy_steppe	2017-01-18	598	-41.5402	-70.8869	1121.26	Field	Intermediate	50	0	0
R80	Grassy_steppe	2017-01-18	598	-41.5402	-70.8869	1121.26	Field	Intermediate	100	0	0
R80	Grassy_steppe	2017-01-18	599	-41.5704	-70.8495	1084	Field	Intermediate	0	1	15
R80	Grassy_steppe	2017-01-18	599	-41.5704	-70.8495	1084	Field	Intermediate	5	1	15
R80	Grassy_steppe	2017-01-18	599	-41.5704	-70.8495	1084	Field	Intermediate	10	1	15
R80	Grassy_steppe	2017-01-18	599	-41.5704	-70.8495	1084	Field	Intermediate	15	1	15
R80	Grassy_steppe	2017-01-18	599	-41.5704	-70.8495	1084	Field	Intermediate	20	1	15
R80	Grassy_steppe	2017-01-18	599	-41.5704	-70.8495	1084	Field	Intermediate	25	0	0
R80	Grassy_steppe	2017-01-18	599	-41.5704	-70.8495	1084	Field	Intermediate	30	0	0
R80	Grassy_steppe	2017-01-18	599	-41.5704	-70.8495	1084	Field	Intermediate	35	0	0
R80	Grassy_steppe	2017-01-18	599	-41.5704	-70.8495	1084	Field	Intermediate	40	0	0
R80	Grassy_steppe	2017-01-18	599	-41.5704	-70.8495	1084	Field	Intermediate	45	1	15
R80	Grassy_steppe	2017-01-18	599	-41.5704	-70.8495	1084	Field	Intermediate	50	1	15
R80	Grassy_steppe	2017-01-18	599	-41.5704	-70.8495	1084	Field	Intermediate	100	1	15
R80	Shrub_steppe	2017-01-18	600	-41.5704	-70.8495	1084.48	Field	Intermediate	0	1	15
R80	Shrub_steppe	2017-01-18	600	-41.5704	-70.8495	1084.48	Field	Intermediate	5	1	15
R80	Shrub_steppe	2017-01-18	600	-41.5704	-70.8495	1084.48	Field	Intermediate	10	0	0
R80	Shrub_steppe	2017-01-18	600	-41.5704	-70.8495	1084.48	Field	Intermediate	15	1	15
R80	Shrub_steppe	2017-01-18	600	-41.5704	-70.8495	1084.48	Field	Intermediate	20	1	15
R80	Shrub_steppe	2017-01-18	600	-41.5704	-70.8495	1084.48	Field	Intermediate	25	1	15
R80	Shrub_steppe	2017-01-18	600	-41.5704	-70.8495	1084.48	Field	Intermediate	30	3	50
R80	Shrub_steppe	2017-01-18	600	-41.5704	-70.8495	1084.48	Field	Intermediate	35	1	15
R80	Shrub_steppe	2017-01-18	600	-41.5704	-70.8495	1084.48	Field	Intermediate	40	1	15
R80	Shrub_steppe	2017-01-18	600	-41.5704	-70.8495	1084.48	Field	Intermediate	45	1	15
R80	Shrub_steppe	2017-01-18	600	-41.5704	-70.8495	1084.48	Field	Intermediate	50	0	0
R80	Shrub_steppe	2017-01-18	600	-41.5704	-70.8495	1084.48	Field	Intermediate	100	2	25
R80	Shrub_steppe	2017-01-18	601	-41.5783	-70.7395	1033.54	Field	Intermediate	0	3	50
R80	Shrub_steppe	2017-01-18	601	-41.5783	-70.7395	1033.54	Field	Intermediate	5	2	25
R80	Shrub_steppe	2017-01-18	601	-41.5783	-70.7395	1033.54	Field	Intermediate	10	1	15
R80	Shrub_steppe	2017-01-18	601	-41.5783	-70.7395	1033.54	Field	Intermediate	15	1	15
R80	Shrub_steppe	2017-01-18	601	-41.5783	-70.7395	1033.54	Field	Intermediate	20	1	15
R80	Shrub_steppe	2017-01-18	601	-41.5783	-70.7395	1033.54	Field	Intermediate	25	2	25
R80	Shrub_steppe	2017-01-18	601	-41.5783	-70.7395	1033.54	Field	Intermediate	30	1	15
R80	Shrub_steppe	2017-01-18	601	-41.5783	-70.7395	1033.54	Field	Intermediate	35	2	25
R80	Shrub_steppe	2017-01-18	601	-41.5783	-70.7395	1033.54	Field	Intermediate	40	2	25
R80	Shrub_steppe	2017-01-18	601	-41.5783	-70.7395	1033.54	Field	Intermediate	45	2	25
R80	Shrub_steppe	2017-01-18	601	-41.5783	-70.7395	1033.54	Field	Intermediate	50	2	25
R80	Shrub_steppe	2017-01-18	601	-41.5783	-70.7395	1033.54	Field	Intermediate	100	2	25
R80	Shrub_steppe	2017-01-18	602	-41.5902	-70.6841	1033.3	Field	Intermediate	0	1	15
R80	Shrub_steppe	2017-01-18	602	-41.5902	-70.6841	1033.3	Field	Intermediate	5	1	15
R80	Shrub_steppe	2017-01-18	602	-41.5902	-70.6841	1033.3	Field	Intermediate	10	2	25
R80	Shrub_steppe	2017-01-18	602	-41.5902	-70.6841	1033.3	Field	Intermediate	15	2	25
R80	Shrub_steppe	2017-01-18	602	-41.5902	-70.6841	1033.3	Field	Intermediate	20	1	15
R80	Shrub_steppe	2017-01-18	602	-41.5902	-70.6841	1033.3	Field	Intermediate	25	2	25
R80	Shrub_steppe	2017-01-18	602	-41.5902	-70.6841	1033.3	Field	Intermediate	30	2	25
R80	Shrub_steppe	2017-01-18	602	-41.5902	-70.6841	1033.3	Field	Intermediate	35	2	25
R80	Shrub_steppe	2017-01-18	602	-41.5902	-70.6841	1033.3	Field	Intermediate	40	2	25
R80	Shrub_steppe	2017-01-18	602	-41.5902	-70.6841	1033.3	Field	Intermediate	45	2	25
R80	Shrub_steppe	2017-01-18	602	-41.5902	-70.6841	1033.3	Field	Intermediate	50	2	25
R80	Shrub_steppe	2017-01-18	602	-41.5902	-70.6841	1033.3	Field	Intermediate	100	2	25
R80	Shrub_steppe	2017-01-18	603	-41.6281	-70.6816	1067.9	Field	High	0	1	15
R80	Shrub_steppe	2017-01-18	603	-41.6281	-70.6816	1067.9	Field	High	5	1	15
R80	Shrub_steppe	2017-01-18	603	-41.6281	-70.6816	1067.9	Field	High	10	0	0
R80	Shrub_steppe	2017-01-18	603	-41.6281	-70.6816	1067.9	Field	High	15	0	0
R80	Shrub_steppe	2017-01-18	603	-41.6281	-70.6816	1067.9	Field	High	20	0	0
R80	Shrub_steppe	2017-01-18	603	-41.6281	-70.6816	1067.9	Field	High	25	0	0
R80	Shrub_steppe	2017-01-18	603	-41.6281	-70.6816	1067.9	Field	High	30	0	0
R80	Shrub_steppe	2017-01-18	603	-41.6281	-70.6816	1067.9	Field	High	35	0	0
R80	Shrub_steppe	2017-01-18	603	-41.6281	-70.6816	1067.9	Field	High	40	0	0
R80	Shrub_steppe	2017-01-18	603	-41.6281	-70.6816	1067.9	Field	High	45	0	0
R80	Shrub_steppe	2017-01-18	603	-41.6281	-70.6816	1067.9	Field	High	50	0	0
R80	Shrub_steppe	2017-01-18	603	-41.6281	-70.6816	1067.9	Field	High	100	0	0
R80	Shrub_steppe	2017-01-18	604	-41.6662	-70.6978	1068.14	Field	Intermediate	0	2	25
R80	Shrub_steppe	2017-01-18	604	-41.6662	-70.6978	1068.14	Field	Intermediate	5	1	15
R80	Shrub_steppe	2017-01-18	604	-41.6662	-70.6978	1068.14	Field	Intermediate	10	2	25
R80	Shrub_steppe	2017-01-18	604	-41.6662	-70.6978	1068.14	Field	Intermediate	15	2	25
R80	Shrub_steppe	2017-01-18	604	-41.6662	-70.6978	1068.14	Field	Intermediate	20	2	25
R80	Shrub_steppe	2017-01-18	604	-41.6662	-70.6978	1068.14	Field	Intermediate	25	1	15
R80	Shrub_steppe	2017-01-18	604	-41.6662	-70.6978	1068.14	Field	Intermediate	30	1	15
R80	Shrub_steppe	2017-01-18	604	-41.6662	-70.6978	1068.14	Field	Intermediate	35	1	15
R80	Shrub_steppe	2017-01-18	604	-41.6662	-70.6978	1068.14	Field	Intermediate	40	2	25
R80	Shrub_steppe	2017-01-18	604	-41.6662	-70.6978	1068.14	Field	Intermediate	45	2	25
R80	Shrub_steppe	2017-01-18	604	-41.6662	-70.6978	1068.14	Field	Intermediate	50	2	25
R80	Shrub_steppe	2017-01-18	604	-41.6662	-70.6978	1068.14	Field	Intermediate	100	2	25
R80	Shrub_steppe	2017-01-18	605	-41.5628	-70.6774	1099.38	Field	High	0	1	15
R80	Shrub_steppe	2017-01-18	605	-41.5628	-70.6774	1099.38	Field	High	5	1	15
R80	Shrub_steppe	2017-01-18	605	-41.5628	-70.6774	1099.38	Field	High	10	1	15
R80	Shrub_steppe	2017-01-18	605	-41.5628	-70.6774	1099.38	Field	High	15	1	15
R80	Shrub_steppe	2017-01-18	605	-41.5628	-70.6774	1099.38	Field	High	20	2	25
R80	Shrub_steppe	2017-01-18	605	-41.5628	-70.6774	1099.38	Field	High	25	4	75
R80	Shrub_steppe	2017-01-18	605	-41.5628	-70.6774	1099.38	Field	High	30	2	25
R80	Shrub_steppe	2017-01-18	605	-41.5628	-70.6774	1099.38	Field	High	35	0	0
R80	Shrub_steppe	2017-01-18	605	-41.5628	-70.6774	1099.38	Field	High	40	0	0
R80	Shrub_steppe	2017-01-18	605	-41.5628	-70.6774	1099.38	Field	High	45	3	50
R80	Shrub_steppe	2017-01-18	605	-41.5628	-70.6774	1099.38	Field	High	50	3	50
R80	Shrub_steppe	2017-01-18	605	-41.5628	-70.6774	1099.38	Field	High	100	3	50
R80	Shrub_steppe	2017-01-18	606	-41.5183	-70.6733	1194.56	Field	Low	0	3	50
R80	Shrub_steppe	2017-01-18	606	-41.5183	-70.6733	1194.56	Field	Low	5	0	0
R80	Shrub_steppe	2017-01-18	606	-41.5183	-70.6733	1194.56	Field	Low	10	0	0
R80	Shrub_steppe	2017-01-18	606	-41.5183	-70.6733	1194.56	Field	Low	15	0	0
R80	Shrub_steppe	2017-01-18	606	-41.5183	-70.6733	1194.56	Field	Low	20	0	0
R80	Shrub_steppe	2017-01-18	606	-41.5183	-70.6733	1194.56	Field	Low	25	0	0
R80	Shrub_steppe	2017-01-18	606	-41.5183	-70.6733	1194.56	Field	Low	30	0	0
R80	Shrub_steppe	2017-01-18	606	-41.5183	-70.6733	1194.56	Field	Low	35	0	0
R80	Shrub_steppe	2017-01-18	606	-41.5183	-70.6733	1194.56	Field	Low	40	0	0
R80	Shrub_steppe	2017-01-18	606	-41.5183	-70.6733	1194.56	Field	Low	45	0	0
R80	Shrub_steppe	2017-01-18	606	-41.5183	-70.6733	1194.56	Field	Low	50	0	0
R80	Shrub_steppe	2017-01-18	606	-41.5183	-70.6733	1194.56	Field	Low	100	0	0
R23	Shrub_steppe	2017-01-26	608	-41.1204	-70.7582	985.95	Field	Intermediate	0	3	50
R23	Shrub_steppe	2017-01-26	608	-41.1204	-70.7582	985.95	Field	Intermediate	5	1	15
R23	Shrub_steppe	2017-01-26	608	-41.1204	-70.7582	985.95	Field	Intermediate	10	3	50
R23	Shrub_steppe	2017-01-26	608	-41.1204	-70.7582	985.95	Field	Intermediate	15	2	25
R23	Shrub_steppe	2017-01-26	608	-41.1204	-70.7582	985.95	Field	Intermediate	20	1	15
R23	Shrub_steppe	2017-01-26	608	-41.1204	-70.7582	985.95	Field	Intermediate	25	1	15
R23	Shrub_steppe	2017-01-26	608	-41.1204	-70.7582	985.95	Field	Intermediate	30	2	25
R23	Shrub_steppe	2017-01-26	608	-41.1204	-70.7582	985.95	Field	Intermediate	35	1	15
R23	Shrub_steppe	2017-01-26	608	-41.1204	-70.7582	985.95	Field	Intermediate	40	2	25
R23	Shrub_steppe	2017-01-26	608	-41.1204	-70.7582	985.95	Field	Intermediate	45	0	0
R23	Shrub_steppe	2017-01-26	608	-41.1204	-70.7582	985.95	Field	Intermediate	50	0	0
R23	Shrub_steppe	2017-01-26	608	-41.1204	-70.7582	985.95	Field	Intermediate	100	0	0
R23	Shrub_steppe	2017-01-26	609	-41.1082	-70.7047	999.409	Field	Intermediate	0	2	25
R23	Shrub_steppe	2017-01-26	609	-41.1082	-70.7047	999.409	Field	Intermediate	5	0	0
R23	Shrub_steppe	2017-01-26	609	-41.1082	-70.7047	999.409	Field	Intermediate	10	0	0
R23	Shrub_steppe	2017-01-26	609	-41.1082	-70.7047	999.409	Field	Intermediate	15	0	0
R23	Shrub_steppe	2017-01-26	609	-41.1082	-70.7047	999.409	Field	Intermediate	20	1	15
R23	Shrub_steppe	2017-01-26	609	-41.1082	-70.7047	999.409	Field	Intermediate	25	1	15
R23	Shrub_steppe	2017-01-26	609	-41.1082	-70.7047	999.409	Field	Intermediate	30	1	15
R23	Shrub_steppe	2017-01-26	609	-41.1082	-70.7047	999.409	Field	Intermediate	35	1	15
R23	Shrub_steppe	2017-01-26	609	-41.1082	-70.7047	999.409	Field	Intermediate	40	1	15
R23	Shrub_steppe	2017-01-26	609	-41.1082	-70.7047	999.409	Field	Intermediate	45	1	15
R23	Shrub_steppe	2017-01-26	609	-41.1082	-70.7047	999.409	Field	Intermediate	50	1	15
R23	Shrub_steppe	2017-01-26	609	-41.1082	-70.7047	999.409	Field	Intermediate	100	1	15
R23	Shrub_steppe	2017-01-26	610	-41.0746	-70.6676	1079.92	Field	Intermediate	0	3	50
R23	Shrub_steppe	2017-01-26	610	-41.0746	-70.6676	1079.92	Field	Intermediate	5	3	50
R23	Shrub_steppe	2017-01-26	610	-41.0746	-70.6676	1079.92	Field	Intermediate	10	3	50
R23	Shrub_steppe	2017-01-26	610	-41.0746	-70.6676	1079.92	Field	Intermediate	15	2	25
R23	Shrub_steppe	2017-01-26	610	-41.0746	-70.6676	1079.92	Field	Intermediate	20	1	15
R23	Shrub_steppe	2017-01-26	610	-41.0746	-70.6676	1079.92	Field	Intermediate	25	1	15
R23	Shrub_steppe	2017-01-26	610	-41.0746	-70.6676	1079.92	Field	Intermediate	30	1	15
R23	Shrub_steppe	2017-01-26	610	-41.0746	-70.6676	1079.92	Field	Intermediate	35	1	15
R23	Shrub_steppe	2017-01-26	610	-41.0746	-70.6676	1079.92	Field	Intermediate	40	1	15
R23	Shrub_steppe	2017-01-26	610	-41.0746	-70.6676	1079.92	Field	Intermediate	45	2	25
R23	Shrub_steppe	2017-01-26	610	-41.0746	-70.6676	1079.92	Field	Intermediate	50	1	15
R23	Shrub_steppe	2017-01-26	610	-41.0746	-70.6676	1079.92	Field	Intermediate	100	1	15
R23	Shrub_steppe	2017-01-26	611	-41.0419	-70.6352	1023.2	Field	Intermediate	0	3	50
R23	Shrub_steppe	2017-01-26	611	-41.0419	-70.6352	1023.2	Field	Intermediate	5	2	25
R23	Shrub_steppe	2017-01-26	611	-41.0419	-70.6352	1023.2	Field	Intermediate	10	2	25
R23	Shrub_steppe	2017-01-26	611	-41.0419	-70.6352	1023.2	Field	Intermediate	15	2	25
R23	Shrub_steppe	2017-01-26	611	-41.0419	-70.6352	1023.2	Field	Intermediate	20	1	15
R23	Shrub_steppe	2017-01-26	611	-41.0419	-70.6352	1023.2	Field	Intermediate	25	1	15
R23	Shrub_steppe	2017-01-26	611	-41.0419	-70.6352	1023.2	Field	Intermediate	30	1	15
R23	Shrub_steppe	2017-01-26	611	-41.0419	-70.6352	1023.2	Field	Intermediate	35	1	15
R23	Shrub_steppe	2017-01-26	611	-41.0419	-70.6352	1023.2	Field	Intermediate	40	1	15
R23	Shrub_steppe	2017-01-26	611	-41.0419	-70.6352	1023.2	Field	Intermediate	45	1	15
R23	Shrub_steppe	2017-01-26	611	-41.0419	-70.6352	1023.2	Field	Intermediate	50	1	15
R23	Shrub_steppe	2017-01-26	611	-41.0419	-70.6352	1023.2	Field	Intermediate	100	1	15
R23	Shrub_steppe	2017-01-26	612	-41.0141	-70.5937	971.29	Field	Intermediate	0	1	15
R23	Shrub_steppe	2017-01-26	612	-41.0141	-70.5937	971.29	Field	Intermediate	5	0	0
R23	Shrub_steppe	2017-01-26	612	-41.0141	-70.5937	971.29	Field	Intermediate	10	0	0
R23	Shrub_steppe	2017-01-26	612	-41.0141	-70.5937	971.29	Field	Intermediate	15	0	0
R23	Shrub_steppe	2017-01-26	612	-41.0141	-70.5937	971.29	Field	Intermediate	20	0	0
R23	Shrub_steppe	2017-01-26	612	-41.0141	-70.5937	971.29	Field	Intermediate	25	0	0
R23	Shrub_steppe	2017-01-26	612	-41.0141	-70.5937	971.29	Field	Intermediate	30	0	0
R23	Shrub_steppe	2017-01-26	612	-41.0141	-70.5937	971.29	Field	Intermediate	35	0	0
R23	Shrub_steppe	2017-01-26	612	-41.0141	-70.5937	971.29	Field	Intermediate	40	0	0
R23	Shrub_steppe	2017-01-26	612	-41.0141	-70.5937	971.29	Field	Intermediate	45	0	0
R23	Shrub_steppe	2017-01-26	612	-41.0141	-70.5937	971.29	Field	Intermediate	50	0	0
R23	Shrub_steppe	2017-01-26	612	-41.0141	-70.5937	971.29	Field	Intermediate	100	0	0
R23	Wet_meadow	2017-01-26	613	-41.0215	-70.5413	1019.12	Field	Low	0	1	15
R23	Wet_meadow	2017-01-26	613	-41.0215	-70.5413	1019.12	Field	Low	5	0	0
R23	Wet_meadow	2017-01-26	613	-41.0215	-70.5413	1019.12	Field	Low	10	0	0
R23	Wet_meadow	2017-01-26	613	-41.0215	-70.5413	1019.12	Field	Low	15	0	0
R23	Wet_meadow	2017-01-26	613	-41.0215	-70.5413	1019.12	Field	Low	20	0	0
R23	Wet_meadow	2017-01-26	613	-41.0215	-70.5413	1019.12	Field	Low	25	0	0
R23	Wet_meadow	2017-01-26	613	-41.0215	-70.5413	1019.12	Field	Low	30	0	0
R23	Wet_meadow	2017-01-26	613	-41.0215	-70.5413	1019.12	Field	Low	35	0	0
R23	Wet_meadow	2017-01-26	613	-41.0215	-70.5413	1019.12	Field	Low	40	0	0
R23	Wet_meadow	2017-01-26	613	-41.0215	-70.5413	1019.12	Field	Low	45	0	0
R23	Wet_meadow	2017-01-26	613	-41.0215	-70.5413	1019.12	Field	Low	50	0	0
R23	Wet_meadow	2017-01-26	613	-41.0215	-70.5413	1019.12	Field	Low	100	0	0
R23	Shrub_steppe	2017-01-26	614	-41.04	-70.4873	1077.28	Field	Intermediate	0	4	75
R23	Shrub_steppe	2017-01-26	614	-41.04	-70.4873	1077.28	Field	Intermediate	5	3	50
R23	Shrub_steppe	2017-01-26	614	-41.04	-70.4873	1077.28	Field	Intermediate	10	1	15
R23	Shrub_steppe	2017-01-26	614	-41.04	-70.4873	1077.28	Field	Intermediate	15	1	15
R23	Shrub_steppe	2017-01-26	614	-41.04	-70.4873	1077.28	Field	Intermediate	20	2	25
R23	Shrub_steppe	2017-01-26	614	-41.04	-70.4873	1077.28	Field	Intermediate	25	1	15
R23	Shrub_steppe	2017-01-26	614	-41.04	-70.4873	1077.28	Field	Intermediate	30	2	25
R23	Shrub_steppe	2017-01-26	614	-41.04	-70.4873	1077.28	Field	Intermediate	35	2	25
R23	Shrub_steppe	2017-01-26	614	-41.04	-70.4873	1077.28	Field	Intermediate	40	2	25
R23	Shrub_steppe	2017-01-26	614	-41.04	-70.4873	1077.28	Field	Intermediate	45	2	25
R23	Shrub_steppe	2017-01-26	614	-41.04	-70.4873	1077.28	Field	Intermediate	50	1	15
R23	Shrub_steppe	2017-01-26	614	-41.04	-70.4873	1077.28	Field	Intermediate	100	1	15
R23	Shrub_steppe	2017-01-26	616	-41.0613	-70.377	843.676	Field	Intermediate	0	1	15
R23	Shrub_steppe	2017-01-26	616	-41.0613	-70.377	843.676	Field	Intermediate	5	3	50
R23	Shrub_steppe	2017-01-26	616	-41.0613	-70.377	843.676	Field	Intermediate	10	2	25
R23	Shrub_steppe	2017-01-26	616	-41.0613	-70.377	843.676	Field	Intermediate	15	3	50
R23	Shrub_steppe	2017-01-26	616	-41.0613	-70.377	843.676	Field	Intermediate	20	2	25
R23	Shrub_steppe	2017-01-26	616	-41.0613	-70.377	843.676	Field	Intermediate	25	2	25
R23	Shrub_steppe	2017-01-26	616	-41.0613	-70.377	843.676	Field	Intermediate	30	2	25
R23	Shrub_steppe	2017-01-26	616	-41.0613	-70.377	843.676	Field	Intermediate	35	2	25
R23	Shrub_steppe	2017-01-26	616	-41.0613	-70.377	843.676	Field	Intermediate	40	2	25
R23	Shrub_steppe	2017-01-26	616	-41.0613	-70.377	843.676	Field	Intermediate	45	2	25
R23	Shrub_steppe	2017-01-26	616	-41.0613	-70.377	843.676	Field	Intermediate	50	3	50
R23	Shrub_steppe	2017-01-26	616	-41.0613	-70.377	843.676	Field	Intermediate	100	3	50

## Sheet: Field Metadata
Variable Name	Description
Route	Route ID
Habitat	Habitat type. Categorical variable with 4 levels: (1) Wet Meadow, (2) Grassy steppe, (3) Shrub steppe, (4) Shrubland.
Date	Sampling date expressed as dd/mm/yyyy
WP_id	Waypoint ID. This ID is the same for Field and Verge data.
Latitude	Latitude in WGS84. This Latitude is the same for Field and Verge data.
Longitude	Longitude in WGS84. This Longitude is the same for Field and Verge data.
Altitude	Altitude in meters above sea. This Altitude is the same for Field and Verge data.
Plot	Indicates if data correspond to Field or Verge
Disturbance_level	Indicates the level of disturbance present in the field. Is a categorical variable with three levels: (1) High, (2) Intermediate, (3) Low
Distance	Distance in meters from the road verge
BT_field_level	Level of Bromus tectorum abundance, expresed as a categorical variable, that ranges from 0 (no B.tectorum) to 5 (High levels of abundcance of B. tectorum).
BT_field_abundance	Bromus tectorum abundance expresed as a number of individuals per square meter. This variable is related to BT_field_level as follows: (1) Level 0: 0 B. tectorum plants, (2) Level 1: Between 1 and 15 plants, (3) Level 2: between 16 and 25 plants, (4) Level 3: between 26 and 50 plants, (5) Level 4: between 51 and 75 plants, (6) Level 5: more than 75 plants

## Sheet: Verges Data
Route	WP_id	Latitude	Longitude	Altitude	Plot	BT_verge_level	BT_verge_abundance
R40-231	1	-41.0395	-71.2155	907.363	Verge	1	15
R40-231	1	-41.0395	-71.2155	907.363	Verge	0	0
R40-231	1	-41.0395	-71.2155	907.363	Verge	1	15
R40-231	1	-41.0395	-71.2155	907.363	Verge	0	0
R40-231	1	-41.0395	-71.2155	907.363	Verge	2	25
R40-231	1	-41.0395	-71.2155	907.363	Verge	3	50
R40-231	1	-41.0395	-71.2155	907.363	Verge	1	15
R40-231	1	-41.0395	-71.2155	907.363	Verge	1	15
R40-231	1	-41.0395	-71.2155	907.363	Verge	0	0
R40-231	1	-41.0395	-71.2155	907.363	Verge	1	15
R40-231	1	-41.0395	-71.2155	907.363	Verge	0	0
R40-231	2	-41.0354	-71.27	907.844	Verge	0	0
R40-231	2	-41.0354	-71.27	907.844	Verge	0	0
R40-231	2	-41.0354	-71.27	907.844	Verge	0	0
R40-231	2	-41.0354	-71.27	907.844	Verge	0	0
R40-231	2	-41.0354	-71.27	907.844	Verge	0	0
R40-231	2	-41.0354	-71.27	907.844	Verge	0	0
R40-231	2	-41.0354	-71.27	907.844	Verge	0	0
R40-231	2	-41.0354	-71.27	907.844	Verge	0	0
R40-231	2	-41.0354	-71.27	907.844	Verge	0	0
R40-231	2	-41.0354	-71.27	907.844	Verge	0	0
R40-231	2	-41.0354	-71.27	907.844	Verge	1	15
R237	4	-40.9978	-71.1178	776.144	Verge	2	25
R237	4	-40.9978	-71.1178	776.144	Verge	2	25
R237	4	-40.9978	-71.1178	776.144	Verge	3	50
R237	4	-40.9978	-71.1178	776.144	Verge	2	25
R237	4	-40.9978	-71.1178	776.144	Verge	2	25
R237	4	-40.9978	-71.1178	776.144	Verge	3	50
R237	4	-40.9978	-71.1178	776.144	Verge	3	50
R237	4	-40.9978	-71.1178	776.144	Verge	2	25
R237	4	-40.9978	-71.1178	776.144	Verge	3	50
R237	4	-40.9978	-71.1178	776.144	Verge	4	75
R237	4	-40.9978	-71.1178	776.144	Verge	4	75
R237	5	-40.9711	-71.0719	760.042	Verge	2	25
R237	5	-40.9711	-71.0719	760.042	Verge	2	25
R237	5	-40.9711	-71.0719	760.042	Verge	2	25
R237	5	-40.9711	-71.0719	760.042	Verge	1	15
R237	5	-40.9711	-71.0719	760.042	Verge	2	25
R237	5	-40.9711	-71.0719	760.042	Verge	3	50
R237	5	-40.9711	-71.0719	760.042	Verge	2	25
R237	5	-40.9711	-71.0719	760.042	Verge	1	15
R237	5	-40.9711	-71.0719	760.042	Verge	1	15
R237	5	-40.9711	-71.0719	760.042	Verge	1	15
R237	5	-40.9711	-71.0719	760.042	Verge	2	25
R237	6	-40.9351	-71.0395	747.064	Verge	3	50
R237	6	-40.9351	-71.0395	747.064	Verge	1	15
R237	6	-40.9351	-71.0395	747.064	Verge	1	15
R237	6	-40.9351	-71.0395	747.064	Verge	2	25
R237	6	-40.9351	-71.0395	747.064	Verge	3	50
R237	6	-40.9351	-71.0395	747.064	Verge	4	75
R237	6	-40.9351	-71.0395	747.064	Verge	4	75
R237	6	-40.9351	-71.0395	747.064	Verge	5	100
R237	6	-40.9351	-71.0395	747.064	Verge	4	75
R237	6	-40.9351	-71.0395	747.064	Verge	3	50
R237	6	-40.9351	-71.0395	747.064	Verge	5	100
R237	7	-40.8879	-71.0421	738.413	Verge	2	25
R237	7	-40.8879	-71.0421	738.413	Verge	4	75
R237	7	-40.8879	-71.0421	738.413	Verge	4	75
R237	7	-40.8879	-71.0421	738.413	Verge	3	50
R237	7	-40.8879	-71.0421	738.413	Verge	2	25
R237	7	-40.8879	-71.0421	738.413	Verge	4	75
R237	7	-40.8879	-71.0421	738.413	Verge	3	50
R237	7	-40.8879	-71.0421	738.413	Verge	2	25
R237	7	-40.8879	-71.0421	738.413	Verge	2	25
R237	7	-40.8879	-71.0421	738.413	Verge	3	50
R237	7	-40.8879	-71.0421	738.413	Verge	1	15
R237	8	-40.8649	-71.0599	739.374	Verge	4	75
R237	8	-40.8649	-71.0599	739.374	Verge	3	50
R237	8	-40.8649	-71.0599	739.374	Verge	3	50
R237	8	-40.8649	-71.0599	739.374	Verge	3	50
R237	8	-40.8649	-71.0599	739.374	Verge	3	50
R237	8	-40.8649	-71.0599	739.374	Verge	4	75
R237	8	-40.8649	-71.0599	739.374	Verge	5	100
R237	8	-40.8649	-71.0599	739.374	Verge	5	100
R237	8	-40.8649	-71.0599	739.374	Verge	3	50
R237	8	-40.8649	-71.0599	739.374	Verge	3	50
R237	8	-40.8649	-71.0599	739.374	Verge	5	100
R237	9	-40.843	-71.1009	727.598	Verge	4	75
R237	9	-40.843	-71.1009	727.598	Verge	4	75
R237	9	-40.843	-71.1009	727.598	Verge	4	75
R237	9	-40.843	-71.1009	727.598	Verge	4	75
R237	9	-40.843	-71.1009	727.598	Verge	4	75
R237	9	-40.843	-71.1009	727.598	Verge	4	75
R237	9	-40.843	-71.1009	727.598	Verge	4	75
R237	9	-40.843	-71.1009	727.598	Verge	4	75
R237	9	-40.843	-71.1009	727.598	Verge	4	75
R237	9	-40.843	-71.1009	727.598	Verge	4	75
R237	9	-40.843	-71.1009	727.598	Verge	4	75
R237	10	-40.8068	-71.1174	711.256	Verge	5	100
R237	10	-40.8068	-71.1174	711.256	Verge	4	75
R237	10	-40.8068	-71.1174	711.256	Verge	5	100
R237	10	-40.8068	-71.1174	711.256	Verge	5	100
R237	10	-40.8068	-71.1174	711.256	Verge	5	100
R237	10	-40.8068	-71.1174	711.256	Verge	5	100
R237	10	-40.8068	-71.1174	711.256	Verge	4	75
R237	10	-40.8068	-71.1174	711.256	Verge	4	75
R237	10	-40.8068	-71.1174	711.256	Verge	4	75
R237	10	-40.8068	-71.1174	711.256	Verge	4	75
R237	10	-40.8068	-71.1174	711.256	Verge	4	75
R237	11	-40.7671	-71.1223	713.659	Verge	2	25
R237	11	-40.7671	-71.1223	713.659	Verge	2	25
R237	11	-40.7671	-71.1223	713.659	Verge	3	50
R237	11	-40.7671	-71.1223	713.659	Verge	2	25
R237	11	-40.7671	-71.1223	713.659	Verge	1	15
R237	11	-40.7671	-71.1223	713.659	Verge	3	50
R237	11	-40.7671	-71.1223	713.659	Verge	1	15
R237	11	-40.7671	-71.1223	713.659	Verge	2	25
R237	11	-40.7671	-71.1223	713.659	Verge	1	15
R237	11	-40.7671	-71.1223	713.659	Verge	3	50
R237	11	-40.7671	-71.1223	713.659	Verge	2	25
R237	12	-40.7291	-71.0984	705.969	Verge	1	15
R237	12	-40.7291	-71.0984	705.969	Verge	1	15
R237	12	-40.7291	-71.0984	705.969	Verge	2	25
R237	12	-40.7291	-71.0984	705.969	Verge	3	50
R237	12	-40.7291	-71.0984	705.969	Verge	2	25
R237	12	-40.7291	-71.0984	705.969	Verge	3	50
R237	12	-40.7291	-71.0984	705.969	Verge	2	25
R237	12	-40.7291	-71.0984	705.969	Verge	3	50
R237	12	-40.7291	-71.0984	705.969	Verge	3	50
R237	12	-40.7291	-71.0984	705.969	Verge	3	50
R237	12	-40.7291	-71.0984	705.969	Verge	2	25
R65-Traful	13	-40.7188	-71.1394	736.01	Verge	0	0
R65-Traful	13	-40.7188	-71.1394	736.01	Verge	1	15
R65-Traful	13	-40.7188	-71.1394	736.01	Verge	1	15
R65-Traful	13	-40.7188	-71.1394	736.01	Verge	0	0
R65-Traful	13	-40.7188	-71.1394	736.01	Verge	0	0
R65-Traful	13	-40.7188	-71.1394	736.01	Verge	1	15
R65-Traful	13	-40.7188	-71.1394	736.01	Verge	1	15
R65-Traful	13	-40.7188	-71.1394	736.01	Verge	0	0
R65-Traful	13	-40.7188	-71.1394	736.01	Verge	0	0
R65-Traful	13	-40.7188	-71.1394	736.01	Verge	1	15
R65-Traful	13	-40.7188	-71.1394	736.01	Verge	1	15
R65-Traful	14	-40.6934	-71.1648	748.506	Verge	0	0
R65-Traful	14	-40.6934	-71.1648	748.506	Verge	0	0
R65-Traful	14	-40.6934	-71.1648	748.506	Verge	1	15
R65-Traful	14	-40.6934	-71.1648	748.506	Verge	1	15
R65-Traful	14	-40.6934	-71.1648	748.506	Verge	0	0
R65-Traful	14	-40.6934	-71.1648	748.506	Verge	0	0
R65-Traful	14	-40.6934	-71.1648	748.506	Verge	0	0
R65-Traful	14	-40.6934	-71.1648	748.506	Verge	0	0
R65-Traful	14	-40.6934	-71.1648	748.506	Verge	1	15
R65-Traful	14	-40.6934	-71.1648	748.506	Verge	0	0
R65-Traful	14	-40.6934	-71.1648	748.506	Verge	0	0
R65-Traful	15	-40.7241	-71.0948	706.449	Verge	0	0
R65-Traful	15	-40.7241	-71.0948	706.449	Verge	2	25
R65-Traful	15	-40.7241	-71.0948	706.449	Verge	0	0
R65-Traful	15	-40.7241	-71.0948	706.449	Verge	0	0
R65-Traful	15	-40.7241	-71.0948	706.449	Verge	1	15
R65-Traful	15	-40.7241	-71.0948	706.449	Verge	1	15
R65-Traful	15	-40.7241	-71.0948	706.449	Verge	0	0
R65-Traful	15	-40.7241	-71.0948	706.449	Verge	0	0
R65-Traful	15	-40.7241	-71.0948	706.449	Verge	0	0
R65-Traful	15	-40.7241	-71.0948	706.449	Verge	0	0
R65-Traful	15	-40.7241	-71.0948	706.449	Verge	0	0
Rex40	17	-41.4639	-70.6555	982.345	Verge	1	15
Rex40	17	-41.4639	-70.6555	982.345	Verge	2	25
Rex40	17	-41.4639	-70.6555	982.345	Verge	2	25
Rex40	17	-41.4639	-70.6555	982.345	Verge	2	25
Rex40	17	-41.4639	-70.6555	982.345	Verge	1	15
Rex40	17	-41.4639	-70.6555	982.345	Verge	2	25
Rex40	17	-41.4639	-70.6555	982.345	Verge	1	15
Rex40	17	-41.4639	-70.6555	982.345	Verge	2	25
Rex40	17	-41.4639	-70.6555	982.345	Verge	1	15
Rex40	17	-41.4639	-70.6555	982.345	Verge	3	50
Rex40	17	-41.4639	-70.6555	982.345	Verge	1	15
Rex40	18	-41.4334	-70.6916	1003.98	Verge	0	0
Rex40	18	-41.4334	-70.6916	1003.98	Verge	0	0
Rex40	18	-41.4334	-70.6916	1003.98	Verge	0	0
Rex40	18	-41.4334	-70.6916	1003.98	Verge	1	15
Rex40	18	-41.4334	-70.6916	1003.98	Verge	0	0
Rex40	18	-41.4334	-70.6916	1003.98	Verge	1	15
Rex40	18	-41.4334	-70.6916	1003.98	Verge	2	25
Rex40	18	-41.4334	-70.6916	1003.98	Verge	1	15
Rex40	18	-41.4334	-70.6916	1003.98	Verge	0	0
Rex40	18	-41.4334	-70.6916	1003.98	Verge	0	0
Rex40	18	-41.4334	-70.6916	1003.98	Verge	1	15
Rex40	19	-41.4334	-70.6916	1003.98	Verge	0	0
Rex40	19	-41.4334	-70.6916	1003.98	Verge	1	15
Rex40	19	-41.4334	-70.6916	1003.98	Verge	1	15
Rex40	19	-41.4334	-70.6916	1003.98	Verge	1	15
Rex40	19	-41.4334	-70.6916	1003.98	Verge	1	15
Rex40	19	-41.4334	-70.6916	1003.98	Verge	2	25
Rex40	19	-41.4334	-70.6916	1003.98	Verge	1	15
Rex40	19	-41.4334	-70.6916	1003.98	Verge	0	0
Rex40	19	-41.4334	-70.6916	1003.98	Verge	0	0
Rex40	19	-41.4334	-70.6916	1003.98	Verge	1	15
Rex40	19	-41.4334	-70.6916	1003.98	Verge	1	15
Rex40	20	-41.3498	-70.696	1095.54	Verge	0	0
Rex40	20	-41.3498	-70.696	1095.54	Verge	0	0
Rex40	20	-41.3498	-70.696	1095.54	Verge	0	0
Rex40	20	-41.3498	-70.696	1095.54	Verge	0	0
Rex40	20	-41.3498	-70.696	1095.54	Verge	1	15
Rex40	20	-41.3498	-70.696	1095.54	Verge	1	15
Rex40	20	-41.3498	-70.696	1095.54	Verge	0	0
Rex40	20	-41.3498	-70.696	1095.54	Verge	0	0
Rex40	20	-41.3498	-70.696	1095.54	Verge	2	25
Rex40	20	-41.3498	-70.696	1095.54	Verge	1	15
Rex40	20	-41.3498	-70.696	1095.54	Verge	0	0
Rex40	21	-41.3088	-70.7034	1049.64	Verge	1	15
Rex40	21	-41.3088	-70.7034	1049.64	Verge	1	15
Rex40	21	-41.3088	-70.7034	1049.64	Verge	2	25
Rex40	21	-41.3088	-70.7034	1049.64	Verge	2	25
Rex40	21	-41.3088	-70.7034	1049.64	Verge	0	0
Rex40	21	-41.3088	-70.7034	1049.64	Verge	1	15
Rex40	21	-41.3088	-70.7034	1049.64	Verge	1	15
Rex40	21	-41.3088	-70.7034	1049.64	Verge	1	15
Rex40	21	-41.3088	-70.7034	1049.64	Verge	0	0
Rex40	21	-41.3088	-70.7034	1049.64	Verge	0	0
Rex40	21	-41.3088	-70.7034	1049.64	Verge	0	0
Rex40	23	-41.2676	-70.6945	1024.64	Verge	3	50
Rex40	23	-41.2676	-70.6945	1024.64	Verge	2	25
Rex40	23	-41.2676	-70.6945	1024.64	Verge	2	25
Rex40	23	-41.2676	-70.6945	1024.64	Verge	3	50
Rex40	23	-41.2676	-70.6945	1024.64	Verge	2	25
Rex40	23	-41.2676	-70.6945	1024.64	Verge	4	75
Rex40	23	-41.2676	-70.6945	1024.64	Verge	3	50
Rex40	23	-41.2676	-70.6945	1024.64	Verge	2	25
Rex40	23	-41.2676	-70.6945	1024.64	Verge	2	25
Rex40	23	-41.2676	-70.6945	1024.64	Verge	3	50
Rex40	23	-41.2676	-70.6945	1024.64	Verge	2	25
Rex40	24	-41.2278	-70.6776	1010.46	Verge	1	15
Rex40	24	-41.2278	-70.6776	1010.46	Verge	0	0
Rex40	24	-41.2278	-70.6776	1010.46	Verge	0	0
Rex40	24	-41.2278	-70.6776	1010.46	Verge	0	0
Rex40	24	-41.2278	-70.6776	1010.46	Verge	0	0
Rex40	24	-41.2278	-70.6776	1010.46	Verge	1	15
Rex40	24	-41.2278	-70.6776	1010.46	Verge	1	15
Rex40	24	-41.2278	-70.6776	1010.46	Verge	0	0
Rex40	24	-41.2278	-70.6776	1010.46	Verge	0	0
Rex40	24	-41.2278	-70.6776	1010.46	Verge	0	0
Rex40	24	-41.2278	-70.6776	1010.46	Verge	0	0
Rex40	25	-41.1878	-70.6877	1002.05	Verge	0	0
Rex40	25	-41.1878	-70.6877	1002.05	Verge	0	0
Rex40	25	-41.1878	-70.6877	1002.05	Verge	3	50
Rex40	25	-41.1878	-70.6877	1002.05	Verge	1	15
Rex40	25	-41.1878	-70.6877	1002.05	Verge	3	50
Rex40	25	-41.1878	-70.6877	1002.05	Verge	4	75
Rex40	25	-41.1878	-70.6877	1002.05	Verge	3	50
Rex40	25	-41.1878	-70.6877	1002.05	Verge	0	0
Rex40	25	-41.1878	-70.6877	1002.05	Verge	3	50
Rex40	25	-41.1878	-70.6877	1002.05	Verge	3	50
Rex40	25	-41.1878	-70.6877	1002.05	Verge	2	25
Rex40	26	-41.1502	-70.6809	981.384	Verge	0	0
Rex40	26	-41.1502	-70.6809	981.384	Verge	0	0
Rex40	26	-41.1502	-70.6809	981.384	Verge	0	0
Rex40	26	-41.1502	-70.6809	981.384	Verge	0	0
Rex40	26	-41.1502	-70.6809	981.384	Verge	0	0
Rex40	26	-41.1502	-70.6809	981.384	Verge	1	15
Rex40	26	-41.1502	-70.6809	981.384	Verge	1	15
Rex40	26	-41.1502	-70.6809	981.384	Verge	1	15
Rex40	26	-41.1502	-70.6809	981.384	Verge	1	15
Rex40	26	-41.1502	-70.6809	981.384	Verge	1	15
Rex40	26	-41.1502	-70.6809	981.384	Verge	1	15
Rex40	27	-41.1215	-70.7017	987.633	Verge	2	25
Rex40	27	-41.1215	-70.7017	987.633	Verge	2	25
Rex40	27	-41.1215	-70.7017	987.633	Verge	1	15
Rex40	27	-41.1215	-70.7017	987.633	Verge	2	25
Rex40	27	-41.1215	-70.7017	987.633	Verge	2	25
Rex40	27	-41.1215	-70.7017	987.633	Verge	3	50
Rex40	27	-41.1215	-70.7017	987.633	Verge	2	25
Rex40	27	-41.1215	-70.7017	987.633	Verge	3	50
Rex40	27	-41.1215	-70.7017	987.633	Verge	2	25
Rex40	27	-41.1215	-70.7017	987.633	Verge	2	25
Rex40	27	-41.1215	-70.7017	987.633	Verge	2	25
R237	247	-40.6865	-71.0251	743.986	Verge	2	25
R237	247	-40.6865	-71.0251	743.986	Verge	2	25
R237	247	-40.6865	-71.0251	743.986	Verge	2	25
R237	247	-40.6865	-71.0251	743.986	Verge	2	25
R237	247	-40.6865	-71.0251	743.986	Verge	2	25
R237	247	-40.6865	-71.0251	743.986	Verge	2	25
R237	247	-40.6865	-71.0251	743.986	Verge	3	50
R237	247	-40.6865	-71.0251	743.986	Verge	2	25
R237	247	-40.6865	-71.0251	743.986	Verge	1	15
R237	247	-40.6865	-71.0251	743.986	Verge	1	15
R237	247	-40.6865	-71.0251	743.986	Verge	1	15
R237	248	-40.6542	-71.0001	751.42	Verge	5	100
R237	248	-40.6542	-71.0001	751.42	Verge	3	50
R237	248	-40.6542	-71.0001	751.42	Verge	3	50
R237	248	-40.6542	-71.0001	751.42	Verge	4	75
R237	248	-40.6542	-71.0001	751.42	Verge	5	100
R237	248	-40.6542	-71.0001	751.42	Verge	5	100
R237	248	-40.6542	-71.0001	751.42	Verge	4	75
R237	248	-40.6542	-71.0001	751.42	Verge	4	75
R237	248	-40.6542	-71.0001	751.42	Verge	5	100
R237	248	-40.6542	-71.0001	751.42	Verge	5	100
R237	248	-40.6542	-71.0001	751.42	Verge	5	100
R237	249	-40.6178	-70.9813	739.803	Verge	4	75
R237	249	-40.6178	-70.9813	739.803	Verge	3	50
R237	249	-40.6178	-70.9813	739.803	Verge	4	75
R237	249	-40.6178	-70.9813	739.803	Verge	4	75
R237	249	-40.6178	-70.9813	739.803	Verge	3	50
R237	249	-40.6178	-70.9813	739.803	Verge	4	75
R237	249	-40.6178	-70.9813	739.803	Verge	5	100
R237	249	-40.6178	-70.9813	739.803	Verge	4	75
R237	249	-40.6178	-70.9813	739.803	Verge	4	75
R237	249	-40.6178	-70.9813	739.803	Verge	3	50
R237	249	-40.6178	-70.9813	739.803	Verge	3	50
R237	251	-40.6008	-70.9578	905.841	Verge	4	75
R237	251	-40.6008	-70.9578	905.841	Verge	3	50
R237	251	-40.6008	-70.9578	905.841	Verge	3	50
R237	251	-40.6008	-70.9578	905.841	Verge	4	75
R237	251	-40.6008	-70.9578	905.841	Verge	5	100
R237	251	-40.6008	-70.9578	905.841	Verge	5	100
R237	251	-40.6008	-70.9578	905.841	Verge	5	100
R237	251	-40.6008	-70.9578	905.841	Verge	4	75
R237	251	-40.6008	-70.9578	905.841	Verge	2	25
R237	251	-40.6008	-70.9578	905.841	Verge	3	50
R237	251	-40.6008	-70.9578	905.841	Verge	5	100
R237	252	-40.5983	-70.9142	846.019	Verge	4	75
R237	252	-40.5983	-70.9142	846.019	Verge	4	75
R237	252	-40.5983	-70.9142	846.019	Verge	5	100
R237	252	-40.5983	-70.9142	846.019	Verge	5	100
R237	252	-40.5983	-70.9142	846.019	Verge	5	100
R237	252	-40.5983	-70.9142	846.019	Verge	5	100
R237	252	-40.5983	-70.9142	846.019	Verge	3	50
R237	252	-40.5983	-70.9142	846.019	Verge	3	50
R237	252	-40.5983	-70.9142	846.019	Verge	4	75
R237	252	-40.5983	-70.9142	846.019	Verge	5	100
R237	252	-40.5983	-70.9142	846.019	Verge	5	100
R237	253	-40.5787	-70.8771	773.897	Verge	3	50
R237	253	-40.5787	-70.8771	773.897	Verge	4	75
R237	253	-40.5787	-70.8771	773.897	Verge	3	50
R237	253	-40.5787	-70.8771	773.897	Verge	4	75
R237	253	-40.5787	-70.8771	773.897	Verge	3	50
R237	253	-40.5787	-70.8771	773.897	Verge	5	100
R237	253	-40.5787	-70.8771	773.897	Verge	4	75
R237	253	-40.5787	-70.8771	773.897	Verge	4	75
R237	253	-40.5787	-70.8771	773.897	Verge	3	50
R237	253	-40.5787	-70.8771	773.897	Verge	1	15
R237	253	-40.5787	-70.8771	773.897	Verge	4	75
R237	254	-40.5696	-70.8234	732.84	Verge	5	100
R237	254	-40.5696	-70.8234	732.84	Verge	5	100
R237	254	-40.5696	-70.8234	732.84	Verge	5	100
R237	254	-40.5696	-70.8234	732.84	Verge	5	100
R237	254	-40.5696	-70.8234	732.84	Verge	5	100
R237	254	-40.5696	-70.8234	732.84	Verge	5	100
R237	254	-40.5696	-70.8234	732.84	Verge	5	100
R237	254	-40.5696	-70.8234	732.84	Verge	5	100
R237	254	-40.5696	-70.8234	732.84	Verge	5	100
R237	254	-40.5696	-70.8234	732.84	Verge	5	100
R237	254	-40.5696	-70.8234	732.84	Verge	5	100
R237	255	-40.5664	-70.7706	846.784	Verge	3	50
R237	255	-40.5664	-70.7706	846.784	Verge	3	50
R237	255	-40.5664	-70.7706	846.784	Verge	3	50
R237	255	-40.5664	-70.7706	846.784	Verge	5	100
R237	255	-40.5664	-70.7706	846.784	Verge	4	75
R237	255	-40.5664	-70.7706	846.784	Verge	3	50
R237	255	-40.5664	-70.7706	846.784	Verge	4	75
R237	255	-40.5664	-70.7706	846.784	Verge	4	75
R237	255	-40.5664	-70.7706	846.784	Verge	4	75
R237	255	-40.5664	-70.7706	846.784	Verge	1	15
R237	255	-40.5664	-70.7706	846.784	Verge	4	75
R237	256	-40.5396	-70.7209	806.502	Verge	3	50
R237	256	-40.5396	-70.7209	806.502	Verge	3	50
R237	256	-40.5396	-70.7209	806.502	Verge	4	75
R237	256	-40.5396	-70.7209	806.502	Verge	3	50
R237	256	-40.5396	-70.7209	806.502	Verge	4	75
R237	256	-40.5396	-70.7209	806.502	Verge	4	75
R237	256	-40.5396	-70.7209	806.502	Verge	3	50
R237	256	-40.5396	-70.7209	806.502	Verge	3	50
R237	256	-40.5396	-70.7209	806.502	Verge	3	50
R237	256	-40.5396	-70.7209	806.502	Verge	3	50
R237	257	-40.5061	-70.6842	830.956	Verge	4	75
R237	257	-40.5061	-70.6842	830.956	Verge	4	75
R237	257	-40.5061	-70.6842	830.956	Verge	4	75
R237	257	-40.5061	-70.6842	830.956	Verge	4	75
R237	257	-40.5061	-70.6842	830.956	Verge	3	50
R237	257	-40.5061	-70.6842	830.956	Verge	5	100
R237	257	-40.5061	-70.6842	830.956	Verge	3	50
R237	257	-40.5061	-70.6842	830.956	Verge	4	75
R237	257	-40.5061	-70.6842	830.956	Verge	4	75
R237	257	-40.5061	-70.6842	830.956	Verge	1	15
R237	257	-40.5061	-70.6842	830.956	Verge	1	15
R237	258	-40.4714	-70.6582	636.372	Verge	3	50
R237	258	-40.4714	-70.6582	636.372	Verge	1	15
R237	258	-40.4714	-70.6582	636.372	Verge	1	15
R237	258	-40.4714	-70.6582	636.372	Verge	4	75
R237	258	-40.4714	-70.6582	636.372	Verge	5	100
R237	258	-40.4714	-70.6582	636.372	Verge	4	75
R237	258	-40.4714	-70.6582	636.372	Verge	5	100
R237	258	-40.4714	-70.6582	636.372	Verge	5	100
R237	258	-40.4714	-70.6582	636.372	Verge	4	75
R237	258	-40.4714	-70.6582	636.372	Verge	4	75
R237	258	-40.4714	-70.6582	636.372	Verge	3	50
R237	261	-40.4155	-70.5586	1062.63	Verge	5	100
R237	261	-40.4155	-70.5586	1062.63	Verge	5	100
R237	261	-40.4155	-70.5586	1062.63	Verge	1	15
R237	261	-40.4155	-70.5586	1062.63	Verge	3	50
R237	261	-40.4155	-70.5586	1062.63	Verge	4	75
R237	261	-40.4155	-70.5586	1062.63	Verge	4	75
R237	261	-40.4155	-70.5586	1062.63	Verge	4	75
R237	261	-40.4155	-70.5586	1062.63	Verge	4	75
R237	261	-40.4155	-70.5586	1062.63	Verge	4	75
R237	261	-40.4155	-70.5586	1062.63	Verge	5	100
R237	261	-40.4155	-70.5586	1062.63	Verge	5	100
R237	262	-40.4208	-70.6085	807.05	Verge	4	75
R237	262	-40.4208	-70.6085	807.05	Verge	3	50
R237	262	-40.4208	-70.6085	807.05	Verge	4	75
R237	262	-40.4208	-70.6085	807.05	Verge	5	100
R237	262	-40.4208	-70.6085	807.05	Verge	5	100
R237	262	-40.4208	-70.6085	807.05	Verge	5	100
R237	262	-40.4208	-70.6085	807.05	Verge	5	100
R237	262	-40.4208	-70.6085	807.05	Verge	4	75
R237	262	-40.4208	-70.6085	807.05	Verge	4	75
R237	262	-40.4208	-70.6085	807.05	Verge	5	100
R237	262	-40.4208	-70.6085	807.05	Verge	3	50
R23	574	-41.0448	-71.0682	1047.47	Verge	4	75
R23	574	-41.0448	-71.0682	1047.47	Verge	3	50
R23	574	-41.0448	-71.0682	1047.47	Verge	1	15
R23	574	-41.0448	-71.0682	1047.47	Verge	1	15
R23	574	-41.0448	-71.0682	1047.47	Verge	3	50
R23	574	-41.0448	-71.0682	1047.47	Verge	1	15
R23	574	-41.0448	-71.0682	1047.47	Verge	1	15
R23	574	-41.0448	-71.0682	1047.47	Verge	2	25
R23	574	-41.0448	-71.0682	1047.47	Verge	3	50
R23	574	-41.0448	-71.0682	1047.47	Verge	1	15
R23	574	-41.0448	-71.0682	1047.47	Verge	1	15
R23	574	-41.0448	-71.0682	1047.47	Verge	NA	NA
R23	575	-41.0558	-71.0215	951.824	Verge	0	0
R23	575	-41.0558	-71.0215	951.824	Verge	1	15
R23	575	-41.0558	-71.0215	951.824	Verge	1	15
R23	575	-41.0558	-71.0215	951.824	Verge	0	0
R23	575	-41.0558	-71.0215	951.824	Verge	0	0
R23	575	-41.0558	-71.0215	951.824	Verge	0	0
R23	575	-41.0558	-71.0215	951.824	Verge	0	0
R23	575	-41.0558	-71.0215	951.824	Verge	0	0
R23	575	-41.0558	-71.0215	951.824	Verge	0	0
R23	575	-41.0558	-71.0215	951.824	Verge	0	0
R23	575	-41.0558	-71.0215	951.824	Verge	0	0
R23	576	-41.0732	-70.9767	934.28	Verge	1	15
R23	576	-41.0732	-70.9767	934.28	Verge	1	15
R23	576	-41.0732	-70.9767	934.28	Verge	0	0
R23	576	-41.0732	-70.9767	934.28	Verge	1	15
R23	576	-41.0732	-70.9767	934.28	Verge	1	15
R23	576	-41.0732	-70.9767	934.28	Verge	0	0
R23	576	-41.0732	-70.9767	934.28	Verge	1	15
R23	576	-41.0732	-70.9767	934.28	Verge	1	15
R23	576	-41.0732	-70.9767	934.28	Verge	1	15
R23	576	-41.0732	-70.9767	934.28	Verge	1	15
R23	576	-41.0732	-70.9767	934.28	Verge	1	15
R23	577	-41.1057	-70.9292	994.362	Verge	0	0
R23	577	-41.1057	-70.9292	994.362	Verge	0	0
R23	577	-41.1057	-70.9292	994.362	Verge	0	0
R23	577	-41.1057	-70.9292	994.362	Verge	0	0
R23	577	-41.1057	-70.9292	994.362	Verge	1	15
R23	577	-41.1057	-70.9292	994.362	Verge	1	15
R23	577	-41.1057	-70.9292	994.362	Verge	0	0
R23	577	-41.1057	-70.9292	994.362	Verge	0	0
R23	577	-41.1057	-70.9292	994.362	Verge	0	0
R23	577	-41.1057	-70.9292	994.362	Verge	0	0
R23	577	-41.1057	-70.9292	994.362	Verge	0	0
R23	578	-41.1194	-70.8923	1005.66	Verge	0	0
R23	578	-41.1194	-70.8923	1005.66	Verge	0	0
R23	578	-41.1194	-70.8923	1005.66	Verge	1	15
R23	578	-41.1194	-70.8923	1005.66	Verge	1	15
R23	578	-41.1194	-70.8923	1005.66	Verge	1	15
R23	578	-41.1194	-70.8923	1005.66	Verge	1	15
R23	578	-41.1194	-70.8923	1005.66	Verge	1	15
R23	578	-41.1194	-70.8923	1005.66	Verge	0	0
R23	578	-41.1194	-70.8923	1005.66	Verge	0	0
R23	578	-41.1194	-70.8923	1005.66	Verge	1	15
R23	578	-41.1194	-70.8923	1005.66	Verge	1	15
R23	579	-41.1096	-70.845	989.075	Verge	1	15
R23	579	-41.1096	-70.845	989.075	Verge	1	15
R23	579	-41.1096	-70.845	989.075	Verge	1	15
R23	579	-41.1096	-70.845	989.075	Verge	1	15
R23	579	-41.1096	-70.845	989.075	Verge	1	15
R23	579	-41.1096	-70.845	989.075	Verge	1	15
R23	579	-41.1096	-70.845	989.075	Verge	1	15
R23	579	-41.1096	-70.845	989.075	Verge	3	50
R23	579	-41.1096	-70.845	989.075	Verge	1	15
R23	579	-41.1096	-70.845	989.075	Verge	3	50
R23	579	-41.1096	-70.845	989.075	Verge	0	0
R23	580	-41.1018	-70.8109	964.561	Verge	4	75
R23	580	-41.1018	-70.8109	964.561	Verge	5	100
R23	580	-41.1018	-70.8109	964.561	Verge	3	50
R23	580	-41.1018	-70.8109	964.561	Verge	5	100
R23	580	-41.1018	-70.8109	964.561	Verge	5	100
R23	580	-41.1018	-70.8109	964.561	Verge	5	100
R23	580	-41.1018	-70.8109	964.561	Verge	3	50
R23	580	-41.1018	-70.8109	964.561	Verge	4	75
R23	580	-41.1018	-70.8109	964.561	Verge	3	50
R23	580	-41.1018	-70.8109	964.561	Verge	5	100
R23	580	-41.1018	-70.8109	964.561	Verge	5	100
R80	581	-41.1442	-71.173	825.411	Verge	5	100
R80	581	-41.1442	-71.173	825.411	Verge	4	75
R80	581	-41.1442	-71.173	825.411	Verge	4	75
R80	581	-41.1442	-71.173	825.411	Verge	0	0
R80	581	-41.1442	-71.173	825.411	Verge	0	0
R80	581	-41.1442	-71.173	825.411	Verge	3	50
R80	581	-41.1442	-71.173	825.411	Verge	1	15
R80	581	-41.1442	-71.173	825.411	Verge	5	100
R80	581	-41.1442	-71.173	825.411	Verge	1	15
R80	581	-41.1442	-71.173	825.411	Verge	1	15
R80	581	-41.1442	-71.173	825.411	Verge	1	15
R80	582	-41.1673	-71.1307	845.839	Verge	0	0
R80	582	-41.1673	-71.1307	845.839	Verge	0	0
R80	582	-41.1673	-71.1307	845.839	Verge	0	0
R80	582	-41.1673	-71.1307	845.839	Verge	0	0
R80	582	-41.1673	-71.1307	845.839	Verge	0	0
R80	582	-41.1673	-71.1307	845.839	Verge	0	0
R80	582	-41.1673	-71.1307	845.839	Verge	0	0
R80	582	-41.1673	-71.1307	845.839	Verge	0	0
R80	582	-41.1673	-71.1307	845.839	Verge	0	0
R80	582	-41.1673	-71.1307	845.839	Verge	0	0
R80	582	-41.1673	-71.1307	845.839	Verge	0	0
R80	583	-41.1992	-71.1015	865.306	Verge	0	0
R80	583	-41.1992	-71.1015	865.306	Verge	1	15
R80	583	-41.1992	-71.1015	865.306	Verge	3	50
R80	583	-41.1992	-71.1015	865.306	Verge	1	15
R80	583	-41.1992	-71.1015	865.306	Verge	1	15
R80	583	-41.1992	-71.1015	865.306	Verge	1	15
R80	583	-41.1992	-71.1015	865.306	Verge	1	15
R80	583	-41.1992	-71.1015	865.306	Verge	1	15
R80	583	-41.1992	-71.1015	865.306	Verge	1	15
R80	583	-41.1992	-71.1015	865.306	Verge	1	15
R80	583	-41.1992	-71.1015	865.306	Verge	1	15
R80	588	-41.2268	-71.0636	1000.85	Verge	3	50
R80	588	-41.2268	-71.0636	1000.85	Verge	1	15
R80	588	-41.2268	-71.0636	1000.85	Verge	3	50
R80	588	-41.2268	-71.0636	1000.85	Verge	1	15
R80	588	-41.2268	-71.0636	1000.85	Verge	1	15
R80	588	-41.2268	-71.0636	1000.85	Verge	4	75
R80	588	-41.2268	-71.0636	1000.85	Verge	1	15
R80	588	-41.2268	-71.0636	1000.85	Verge	0	0
R80	588	-41.2268	-71.0636	1000.85	Verge	1	15
R80	588	-41.2268	-71.0636	1000.85	Verge	1	15
R80	588	-41.2268	-71.0636	1000.85	Verge	1	15
R80	589	-41.2484	-71.0283	1150.09	Verge	0	0
R80	589	-41.2484	-71.0283	1150.09	Verge	0	0
R80	589	-41.2484	-71.0283	1150.09	Verge	0	0
R80	589	-41.2484	-71.0283	1150.09	Verge	0	0
R80	589	-41.2484	-71.0283	1150.09	Verge	0	0
R80	589	-41.2484	-71.0283	1150.09	Verge	0	0
R80	589	-41.2484	-71.0283	1150.09	Verge	0	0
R80	589	-41.2484	-71.0283	1150.09	Verge	0	0
R80	589	-41.2484	-71.0283	1150.09	Verge	0	0
R80	589	-41.2484	-71.0283	1150.09	Verge	0	0
R80	589	-41.2484	-71.0283	1150.09	Verge	0	0
R80	590	-41.2902	-71.0394	1112.12	Verge	0	0
R80	590	-41.2902	-71.0394	1112.12	Verge	0	0
R80	590	-41.2902	-71.0394	1112.12	Verge	0	0
R80	590	-41.2902	-71.0394	1112.12	Verge	0	0
R80	590	-41.2902	-71.0394	1112.12	Verge	0	0
R80	590	-41.2902	-71.0394	1112.12	Verge	0	0
R80	590	-41.2902	-71.0394	1112.12	Verge	0	0
R80	590	-41.2902	-71.0394	1112.12	Verge	0	0
R80	590	-41.2902	-71.0394	1112.12	Verge	0	0
R80	590	-41.2902	-71.0394	1112.12	Verge	0	0
R80	590	-41.2902	-71.0394	1112.12	Verge	0	0
R80	591	-41.3279	-71.0322	1135.19	Verge	0	0
R80	591	-41.3279	-71.0322	1135.19	Verge	0	0
R80	591	-41.3279	-71.0322	1135.19	Verge	0	0
R80	591	-41.3279	-71.0322	1135.19	Verge	0	0
R80	591	-41.3279	-71.0322	1135.19	Verge	0	0
R80	591	-41.3279	-71.0322	1135.19	Verge	0	0
R80	591	-41.3279	-71.0322	1135.19	Verge	0	0
R80	591	-41.3279	-71.0322	1135.19	Verge	0	0
R80	591	-41.3279	-71.0322	1135.19	Verge	0	0
R80	591	-41.3279	-71.0322	1135.19	Verge	0	0
R80	591	-41.3279	-71.0322	1135.19	Verge	0	0
R80	592	-41.4431	-70.9966	1247.91	Verge	0	0
R80	592	-41.4431	-70.9966	1247.91	Verge	0	0
R80	592	-41.4431	-70.9966	1247.91	Verge	0	0
R80	592	-41.4431	-70.9966	1247.91	Verge	0	0
R80	592	-41.4431	-70.9966	1247.91	Verge	0	0
R80	592	-41.4431	-70.9966	1247.91	Verge	0	0
R80	592	-41.4431	-70.9966	1247.91	Verge	0	0
R80	592	-41.4431	-70.9966	1247.91	Verge	0	0
R80	592	-41.4431	-70.9966	1247.91	Verge	0	0
R80	592	-41.4431	-70.9966	1247.91	Verge	0	0
R80	592	-41.4431	-70.9966	1247.91	Verge	0	0
R80	593	-41.406	-71.0104	1173.89	Verge	1	15
R80	593	-41.406	-71.0104	1173.89	Verge	0	0
R80	593	-41.406	-71.0104	1173.89	Verge	0	0
R80	593	-41.406	-71.0104	1173.89	Verge	0	0
R80	593	-41.406	-71.0104	1173.89	Verge	0	0
R80	593	-41.406	-71.0104	1173.89	Verge	0	0
R80	593	-41.406	-71.0104	1173.89	Verge	0	0
R80	593	-41.406	-71.0104	1173.89	Verge	0	0
R80	593	-41.406	-71.0104	1173.89	Verge	0	0
R80	593	-41.406	-71.0104	1173.89	Verge	0	0
R80	593	-41.406	-71.0104	1173.89	Verge	0	0
R80	594	-41.4431	-70.9966	1237.81	Verge	0	0
R80	594	-41.4431	-70.9966	1237.81	Verge	0	0
R80	594	-41.4431	-70.9966	1237.81	Verge	0	0
R80	594	-41.4431	-70.9966	1237.81	Verge	0	0
R80	594	-41.4431	-70.9966	1237.81	Verge	0	0
R80	594	-41.4431	-70.9966	1237.81	Verge	1	15
R80	594	-41.4431	-70.9966	1237.81	Verge	0	0
R80	594	-41.4431	-70.9966	1237.81	Verge	0	0
R80	594	-41.4431	-70.9966	1237.81	Verge	1	15
R80	594	-41.4431	-70.9966	1237.81	Verge	0	0
R80	594	-41.4431	-70.9966	1237.81	Verge	0	0
R80	595	-41.4871	-70.9875	1160.19	Verge	1	15
R80	595	-41.4871	-70.9875	1160.19	Verge	0	0
R80	595	-41.4871	-70.9875	1160.19	Verge	0	0
R80	595	-41.4871	-70.9875	1160.19	Verge	1	15
R80	595	-41.4871	-70.9875	1160.19	Verge	0	0
R80	595	-41.4871	-70.9875	1160.19	Verge	1	15
R80	595	-41.4871	-70.9875	1160.19	Verge	1	15
R80	595	-41.4871	-70.9875	1160.19	Verge	1	15
R80	595	-41.4871	-70.9875	1160.19	Verge	0	0
R80	595	-41.4871	-70.9875	1160.19	Verge	0	0
R80	595	-41.4871	-70.9875	1160.19	Verge	0	0
R80	596	-41.5208	-70.9926	1194.31	Verge	0	0
R80	596	-41.5208	-70.9926	1194.31	Verge	0	0
R80	596	-41.5208	-70.9926	1194.31	Verge	0	0
R80	596	-41.5208	-70.9926	1194.31	Verge	0	0
R80	596	-41.5208	-70.9926	1194.31	Verge	0	0
R80	596	-41.5208	-70.9926	1194.31	Verge	1	15
R80	596	-41.5208	-70.9926	1194.31	Verge	0	0
R80	596	-41.5208	-70.9926	1194.31	Verge	0	0
R80	596	-41.5208	-70.9926	1194.31	Verge	0	0
R80	596	-41.5208	-70.9926	1194.31	Verge	0	0
R80	596	-41.5208	-70.9926	1194.31	Verge	0	0
R80	597	-41.5267	-70.9425	1156.1	Verge	1	15
R80	597	-41.5267	-70.9425	1156.1	Verge	1	15
R80	597	-41.5267	-70.9425	1156.1	Verge	1	15
R80	597	-41.5267	-70.9425	1156.1	Verge	3	50
R80	597	-41.5267	-70.9425	1156.1	Verge	1	15
R80	597	-41.5267	-70.9425	1156.1	Verge	1	15
R80	597	-41.5267	-70.9425	1156.1	Verge	0	0
R80	597	-41.5267	-70.9425	1156.1	Verge	0	0
R80	597	-41.5267	-70.9425	1156.1	Verge	0	0
R80	597	-41.5267	-70.9425	1156.1	Verge	0	0
R80	597	-41.5267	-70.9425	1156.1	Verge	0	0
R80	598	-41.5402	-70.8869	1121.26	Verge	0	0
R80	598	-41.5402	-70.8869	1121.26	Verge	0	0
R80	598	-41.5402	-70.8869	1121.26	Verge	1	15
R80	598	-41.5402	-70.8869	1121.26	Verge	1	15
R80	598	-41.5402	-70.8869	1121.26	Verge	1	15
R80	598	-41.5402	-70.8869	1121.26	Verge	1	15
R80	598	-41.5402	-70.8869	1121.26	Verge	1	15
R80	598	-41.5402	-70.8869	1121.26	Verge	1	15
R80	598	-41.5402	-70.8869	1121.26	Verge	0	0
R80	598	-41.5402	-70.8869	1121.26	Verge	1	15
R80	598	-41.5402	-70.8869	1121.26	Verge	1	15
R80	599	-41.5704	-70.8495	1084	Verge	1	15
R80	599	-41.5704	-70.8495	1084	Verge	0	0
R80	599	-41.5704	-70.8495	1084	Verge	1	15
R80	599	-41.5704	-70.8495	1084	Verge	0	0
R80	599	-41.5704	-70.8495	1084	Verge	0	0
R80	599	-41.5704	-70.8495	1084	Verge	0	0
R80	599	-41.5704	-70.8495	1084	Verge	1	15
R80	599	-41.5704	-70.8495	1084	Verge	1	15
R80	599	-41.5704	-70.8495	1084	Verge	0	0
R80	599	-41.5704	-70.8495	1084	Verge	0	0
R80	599	-41.5704	-70.8495	1084	Verge	1	15
R80	600	-41.5704	-70.8495	1084.48	Verge	0	0
R80	600	-41.5704	-70.8495	1084.48	Verge	0	0
R80	600	-41.5704	-70.8495	1084.48	Verge	0	0
R80	600	-41.5704	-70.8495	1084.48	Verge	0	0
R80	600	-41.5704	-70.8495	1084.48	Verge	1	15
R80	600	-41.5704	-70.8495	1084.48	Verge	1	15
R80	600	-41.5704	-70.8495	1084.48	Verge	1	15
R80	600	-41.5704	-70.8495	1084.48	Verge	1	15
R80	600	-41.5704	-70.8495	1084.48	Verge	1	15
R80	600	-41.5704	-70.8495	1084.48	Verge	1	15
R80	600	-41.5704	-70.8495	1084.48	Verge	3	50
R80	601	-41.5783	-70.7395	1033.54	Verge	5	100
R80	601	-41.5783	-70.7395	1033.54	Verge	5	100
R80	601	-41.5783	-70.7395	1033.54	Verge	1	15
R80	601	-41.5783	-70.7395	1033.54	Verge	1	15
R80	601	-41.5783	-70.7395	1033.54	Verge	4	75
R80	601	-41.5783	-70.7395	1033.54	Verge	4	75
R80	601	-41.5783	-70.7395	1033.54	Verge	5	100
R80	601	-41.5783	-70.7395	1033.54	Verge	5	100
R80	601	-41.5783	-70.7395	1033.54	Verge	2	25
R80	601	-41.5783	-70.7395	1033.54	Verge	3	50
R80	601	-41.5783	-70.7395	1033.54	Verge	2	25
R80	602	-41.5902	-70.6841	1033.3	Verge	1	15
R80	602	-41.5902	-70.6841	1033.3	Verge	1	15
R80	602	-41.5902	-70.6841	1033.3	Verge	2	25
R80	602	-41.5902	-70.6841	1033.3	Verge	1	15
R80	602	-41.5902	-70.6841	1033.3	Verge	2	25
R80	602	-41.5902	-70.6841	1033.3	Verge	3	50
R80	602	-41.5902	-70.6841	1033.3	Verge	2	25
R80	602	-41.5902	-70.6841	1033.3	Verge	0	0
R80	602	-41.5902	-70.6841	1033.3	Verge	2	25
R80	602	-41.5902	-70.6841	1033.3	Verge	2	25
R80	602	-41.5902	-70.6841	1033.3	Verge	3	50
R80	603	-41.6281	-70.6816	1067.9	Verge	1	15
R80	603	-41.6281	-70.6816	1067.9	Verge	1	15
R80	603	-41.6281	-70.6816	1067.9	Verge	1	15
R80	603	-41.6281	-70.6816	1067.9	Verge	1	15
R80	603	-41.6281	-70.6816	1067.9	Verge	1	15
R80	603	-41.6281	-70.6816	1067.9	Verge	1	15
R80	603	-41.6281	-70.6816	1067.9	Verge	0	0
R80	603	-41.6281	-70.6816	1067.9	Verge	0	0
R80	603	-41.6281	-70.6816	1067.9	Verge	0	0
R80	603	-41.6281	-70.6816	1067.9	Verge	0	0
R80	603	-41.6281	-70.6816	1067.9	Verge	0	0
R80	604	-41.6662	-70.6978	1068.14	Verge	2	25
R80	604	-41.6662	-70.6978	1068.14	Verge	3	50
R80	604	-41.6662	-70.6978	1068.14	Verge	1	15
R80	604	-41.6662	-70.6978	1068.14	Verge	2	25
R80	604	-41.6662	-70.6978	1068.14	Verge	3	50
R80	604	-41.6662	-70.6978	1068.14	Verge	3	50
R80	604	-41.6662	-70.6978	1068.14	Verge	1	15
R80	604	-41.6662	-70.6978	1068.14	Verge	1	15
R80	604	-41.6662	-70.6978	1068.14	Verge	1	15
R80	604	-41.6662	-70.6978	1068.14	Verge	1	15
R80	604	-41.6662	-70.6978	1068.14	Verge	2	25
R80	605	-41.5628	-70.6774	1099.38	Verge	NA	NA
R80	605	-41.5628	-70.6774	1099.38	Verge	0	0
R80	605	-41.5628	-70.6774	1099.38	Verge	1	15
R80	605	-41.5628	-70.6774	1099.38	Verge	1	15
R80	605	-41.5628	-70.6774	1099.38	Verge	1	15
R80	605	-41.5628	-70.6774	1099.38	Verge	1	15
R80	605	-41.5628	-70.6774	1099.38	Verge	3	50
R80	605	-41.5628	-70.6774	1099.38	Verge	1	15
R80	605	-41.5628	-70.6774	1099.38	Verge	2	25
R80	605	-41.5628	-70.6774	1099.38	Verge	2	25
R80	605	-41.5628	-70.6774	1099.38	Verge	1	15
R80	605	-41.5628	-70.6774	1099.38	Verge	1	15
R80	606	-41.5183	-70.6733	1194.56	Verge	0	0
R80	606	-41.5183	-70.6733	1194.56	Verge	0	0
R80	606	-41.5183	-70.6733	1194.56	Verge	1	15
R80	606	-41.5183	-70.6733	1194.56	Verge	1	15
R80	606	-41.5183	-70.6733	1194.56	Verge	1	15
R80	606	-41.5183	-70.6733	1194.56	Verge	1	15
R80	606	-41.5183	-70.6733	1194.56	Verge	0	0
R80	606	-41.5183	-70.6733	1194.56	Verge	0	0
R80	606	-41.5183	-70.6733	1194.56	Verge	0	0
R80	606	-41.5183	-70.6733	1194.56	Verge	0	0
R80	606	-41.5183	-70.6733	1194.56	Verge	0	0
R23	608	-41.1204	-70.7582	985.95	Verge	4	75
R23	608	-41.1204	-70.7582	985.95	Verge	4	75
R23	608	-41.1204	-70.7582	985.95	Verge	4	75
R23	608	-41.1204	-70.7582	985.95	Verge	4	75
R23	608	-41.1204	-70.7582	985.95	Verge	4	75
R23	608	-41.1204	-70.7582	985.95	Verge	4	75
R23	608	-41.1204	-70.7582	985.95	Verge	4	75
R23	608	-41.1204	-70.7582	985.95	Verge	4	75
R23	608	-41.1204	-70.7582	985.95	Verge	4	75
R23	608	-41.1204	-70.7582	985.95	Verge	4	75
R23	608	-41.1204	-70.7582	985.95	Verge	4	75
R23	609	-41.1082	-70.7047	999.409	Verge	3	50
R23	609	-41.1082	-70.7047	999.409	Verge	4	75
R23	609	-41.1082	-70.7047	999.409	Verge	4	75
R23	609	-41.1082	-70.7047	999.409	Verge	4	75
R23	609	-41.1082	-70.7047	999.409	Verge	3	50
R23	609	-41.1082	-70.7047	999.409	Verge	4	75
R23	609	-41.1082	-70.7047	999.409	Verge	3	50
R23	609	-41.1082	-70.7047	999.409	Verge	2	25
R23	609	-41.1082	-70.7047	999.409	Verge	3	50
R23	609	-41.1082	-70.7047	999.409	Verge	3	50
R23	609	-41.1082	-70.7047	999.409	Verge	2	25
R23	610	-41.0746	-70.6676	1079.92	Verge	3	50
R23	610	-41.0746	-70.6676	1079.92	Verge	4	75
R23	610	-41.0746	-70.6676	1079.92	Verge	4	75
R23	610	-41.0746	-70.6676	1079.92	Verge	4	75
R23	610	-41.0746	-70.6676	1079.92	Verge	4	75
R23	610	-41.0746	-70.6676	1079.92	Verge	4	75
R23	610	-41.0746	-70.6676	1079.92	Verge	4	75
R23	610	-41.0746	-70.6676	1079.92	Verge	4	75
R23	610	-41.0746	-70.6676	1079.92	Verge	4	75
R23	610	-41.0746	-70.6676	1079.92	Verge	4	75
R23	610	-41.0746	-70.6676	1079.92	Verge	4	75
R23	611	-41.0419	-70.6352	1023.2	Verge	4	75
R23	611	-41.0419	-70.6352	1023.2	Verge	4	75
R23	611	-41.0419	-70.6352	1023.2	Verge	4	75
R23	611	-41.0419	-70.6352	1023.2	Verge	4	75
R23	611	-41.0419	-70.6352	1023.2	Verge	3	50
R23	611	-41.0419	-70.6352	1023.2	Verge	4	75
R23	611	-41.0419	-70.6352	1023.2	Verge	3	50
R23	611	-41.0419	-70.6352	1023.2	Verge	4	75
R23	611	-41.0419	-70.6352	1023.2	Verge	4	75
R23	611	-41.0419	-70.6352	1023.2	Verge	4	75
R23	611	-41.0419	-70.6352	1023.2	Verge	4	75
R23	612	-41.0141	-70.5937	971.29	Verge	2	25
R23	612	-41.0141	-70.5937	971.29	Verge	1	15
R23	612	-41.0141	-70.5937	971.29	Verge	2	25
R23	612	-41.0141	-70.5937	971.29	Verge	2	25
R23	612	-41.0141	-70.5937	971.29	Verge	2	25
R23	612	-41.0141	-70.5937	971.29	Verge	2	25
R23	612	-41.0141	-70.5937	971.29	Verge	1	15
R23	612	-41.0141	-70.5937	971.29	Verge	2	25
R23	612	-41.0141	-70.5937	971.29	Verge	0	0
R23	612	-41.0141	-70.5937	971.29	Verge	0	0
R23	612	-41.0141	-70.5937	971.29	Verge	1	15
R23	613	-41.0215	-70.5413	1019.12	Verge	1	15
R23	613	-41.0215	-70.5413	1019.12	Verge	0	0
R23	613	-41.0215	-70.5413	1019.12	Verge	1	15
R23	613	-41.0215	-70.5413	1019.12	Verge	2	25
R23	613	-41.0215	-70.5413	1019.12	Verge	1	15
R23	613	-41.0215	-70.5413	1019.12	Verge	1	15
R23	613	-41.0215	-70.5413	1019.12	Verge	1	15
R23	613	-41.0215	-70.5413	1019.12	Verge	1	15
R23	613	-41.0215	-70.5413	1019.12	Verge	1	15
R23	613	-41.0215	-70.5413	1019.12	Verge	1	15
R23	613	-41.0215	-70.5413	1019.12	Verge	0	0
R23	614	-41.04	-70.4873	1077.28	Verge	4	75
R23	614	-41.04	-70.4873	1077.28	Verge	4	75
R23	614	-41.04	-70.4873	1077.28	Verge	3	50
R23	614	-41.04	-70.4873	1077.28	Verge	2	25
R23	614	-41.04	-70.4873	1077.28	Verge	3	50
R23	614	-41.04	-70.4873	1077.28	Verge	4	75
R23	614	-41.04	-70.4873	1077.28	Verge	3	50
R23	614	-41.04	-70.4873	1077.28	Verge	3	50
R23	614	-41.04	-70.4873	1077.28	Verge	2	25
R23	614	-41.04	-70.4873	1077.28	Verge	1	15
R23	614	-41.04	-70.4873	1077.28	Verge	4	75
R23	616	-41.0613	-70.377	843.676	Verge	1	15
R23	616	-41.0613	-70.377	843.676	Verge	2	25
R23	616	-41.0613	-70.377	843.676	Verge	2	25
R23	616	-41.0613	-70.377	843.676	Verge	4	75
R23	616	-41.0613	-70.377	843.676	Verge	2	25
R23	616	-41.0613	-70.377	843.676	Verge	2	25
R23	616	-41.0613	-70.377	843.676	Verge	2	25
R23	616	-41.0613	-70.377	843.676	Verge	1	15
R23	616	-41.0613	-70.377	843.676	Verge	2	25
R23	616	-41.0613	-70.377	843.676	Verge	0	0
R23	616	-41.0613	-70.377	843.676	Verge	1	15

## Sheet: Verges Metadata
Variable Name	Description
Route	Route ID
WP_id	Waypoint ID. This ID is the same for Field and Verge data.
Latitude	Latitude in WGS84. This Latitude is the same for Field and Verge data.
Longitude	Longitude in WGS84. This Longitude is the same for Field and Verge data.
Altitude	Altitude in meters above sea. This Altitude is the same for Field and Verge data.
Plot	Indicates if data correspond to Field or Verge
BT_verge_level	Level of Bromus tectorum abundance, expresed as a categorical variable, that ranges from 0 (no B.tectorum) to 5 (High levels of abundcance of B. tectorum).
BT_verge_abundance	Bromus tectorum abundance expresed as a number of individuals per square meter. This variable is related to BT_verge_level as follows: (1) Level 0: 0 B. tectorum plants, (2) Level 1: Between 1 and 15 plants, (3) Level 2: between 16 and 25 plants, (4) Level 3: between 26 and 50 plants, (5) Level 4: between 51 and 75 plants, (6) Level 5: more than 75 plants
